# Supplementary material for: Adsorption of phenol over bio-based silica/calcium carbonate (CS-SiO 2 /CaCO 3 ) nanocomposite synthesized from waste eggshells and rice husks
Source: PeerJ journal article supplement (doi:10.7717/peerj-pchem.17), 2021-03-02
Supplement: Adsorption_Data_IBB.xlsx [file Adsorption_Data_IBB.xlsx]

## Sheet: pH
CS-SiO2/CaCO3							RHSiO2							ESCaCO3
pH	Vol (ml)	Dose (g)	Ci	Cf (mg/L)	%R		pH	Vol (ml)	Dose (g)	Ci	Cf (mg/L)	%R		pH	Vol (ml)	Dose (g)	Ci	Cf (mg/L)	%R
4	20	0.15	25	4.62	81.54		4	20	0.15	25	8.69	65.24		4	20	0.15	25	13.92	44.34
5.4	20	0.15	25	3.94	84.22		5.4	20	0.15	25	5.32	78.72		5.4	20	0.15	25	12.84	48.62
6	20	0.15	25	4.2	83.19		6	20	0.15	25	6.1	75.64		6	20	0.15	25	12.3	50.79
7.4	20	0.15	25	5.02	79.91		7.4	20	0.15	25	8.05	67.82		7.4	20	0.15	25	15.92	36.31
8	20	0.15	25	7.09	71.62		8	20	0.15	25	8.54	65.83		8	20	0.15	25	16.9	32.42

## Sheet: dosage
CS-SiO2/CaCO3 NPs						RHSiO2						ESCaCO3
Dose (g/L)	Vol (ml)	Ci	CF	%R		Dose (g/L)	Vol (ml)	Ci	CF	%R		Dose (g/L)	Vol (ml)	Ci	CF	%R
0.05	20	25	22.05	11.8		0.05	20	25	23.15	7.4		0.05	20	25	22.97	8.12
0.1	20	25	9.46	62.17		0.1	20	25	11.06	55.77		0.1	20	25	9.79	60.83
0.15	20	25	4.87	80.53		0.15	20	25	8.35	66.61		0.15	20	25	8.87	64.53
0.2	20	25	4.81	80.77		0.2	20	25	6.81	72.77		0.2	20	25	6.51	73.97
0.25	20	25	5.06	79.76		0.25	20	25	6.06	75.76		0.25	20	25	5.96	76.16

## Sheet: Contact Time 
CS-SiO2/CaCO3 NPs							RHSiO2							ESCaCO3
Time	Vol (ml)	Ci	Dose (g)	CF	R%		Time	Vol (ml)	Ci	Dose (g)	CF	R%		Time	Vol (ml)	Ci	Dose (g)	CF	R%
30	20	25	0.15	10.01	59.95		30	20	25	0.15	16.01	35.95		30	20	25	0.15	15.61	37.55
45	20	25	0.15	6.01	75.96		45	20	25	0.15	12.91	48.36		45	20	25	0.15	12.23	51.08
60	20	25	0.15	3.96	84.15		60	20	25	0.15	11.52	53.9		60	20	25	0.15	11.52	53.9
70	20	25	0.15	3.57	85.7		70	20	25	0.15	11.5	53.98		70	20	25	0.15	11.4	54.38
80	20	25	0.15	3.42	86.33		80	20	25	0.15	10.32	58.73		80	20	25	0.15	11.42	54.33
90	20	25	0.15	2.61	89.56		90	20	25	0.15	10.51	57.96		90	20	25	0.15	11.11	55.56

## Sheet: Initial Conc
CS-SiO2/CaCO3 NPs							RHSiO2						ESCaCO3
Ci	Vol (ml)	Dose (g)	Cf	%R			Ci	Vol (ml)	Dose (g)	Cf	%R		Ci	Vol (ml)	Dose (g)	Cf	%R
5	20	0.15	3.52	29.63			5	20	0.15	3.07	38.63		5	20	0.15	3.52	29.63
10	20	0.15	5.65	43.54			10	20	0.15	3.65	63.54		10	20	0.15	6.65	33.54
15	20	0.15	4.89	67.39			15	20	0.15	5.83	61.13		15	20	0.15	6.89	54.06
20	20	0.15	4.8	76.01			20	20	0.15	4.1	79.51		20	20	0.15	7	65.01
25	20	0.15	3.07	87.73			25	20	0.15	7.07	71.73		25	20	0.15	8.97	64.13
30	20	0.15	3.66	87.8			30	20	0.15	8.96	70.14		30	20	0.15	10.33	65.56

## Sheet:  Kinetic
CS-SiO2/CaCO3 NPs									RHSiO2									ESCaCO3
Time	Ci (mg/L)	m (g)	Vol (ml)	Cf(mg/L)	qt (mg/g)	t/qt	log(qe-qt)		Time	Ci (mg/L)	m (g)	Vol (ml)	Cf(mg/L)	qt (mg/g)	t/qt	log(qe-qt)		Time	Ci (mg/L)	m (g)	Vol (ml)	Cf(mg/L)	qt (mg/g)	t/qt	log(qe-qt)
30	25	0.15	20	10.01	2	15.01	0.3		30	25	0.15	20	16.01	1.19838	25.03	0.255		30	25	0.15	20	15.61	1.15838	25.89	0.215
45	25	0.15	20	6.01	2.53	17.77	0.166		45	25	0.15	20	12.91	1.61194	27.916	0.14		45	25	0.15	20	12.23	1.7026	26.43	0.04
60	25	0.15	20	3.96	2.81	21.39	0.077		60	25	0.15	20	11.52	1.79677	33.39	0.08		60	25	0.15	20	11.52	1.79677	33.39	0.0014
70	25	0.15	20	3.57	2.86	24.5	0.058		70	25	0.15	20	11.5	1.79944	38.9	0.079		70	25	0.15	20	11.4	1.81277	38.61	-0.0055
80	25	0.15	20	3.42	2.88	27.8	0.05		80	25	0.15	20	10.32	1.95766	40.865	0.018		80	25	0.15	20	11.42	1.81099	44.17	-0.0047
90	25	0.15	20	2.61	2.99	30.147	0.006		90	25	0.15	20	10.51	1.93195	46.585	0.028		90	25	0.15	20	11.11	1.85195	48.59	-0.02316

## Sheet: Adsoption
CS-SiO2/CaCO3 NPs									RHSiO2									ESCaCO3
Ci	Vol (ml)	Dose (g)	Ce	qe	Ce/qe	logce	logqe		Ci	Vol (ml)	Dose (g)	Ce	qe	Ce/qe	logce	logqe		Ci	Vol (ml)	Dose (g)	Ce	qe	Ce/qe	logce	logqe
5	20	0.15	1.48	3.95	0.375	0.17	0.59		5	20	0.15	1.93	5.15	0.375	0.285	0.71		5	20	0.15	1.48	3.95	0.375	0.17	0.59
10	20	0.15	4.35	5.805	0.75	0.638	0.76		10	20	0.15	6.35	8.47	0.75	0.8	0.927		10	20	0.15	3.35	4.47	0.75	0.525	0.65
15	20	0.15	10.108	8.985	1.125	1.004	0.95		15	20	0.15	9.169	8.15	1.125	0.96	0.91		15	20	0.15	8.108	7.207	1.125	0.908	0.857
20	20	0.15	15.2	10.13	1.5	1.18	1.005		20	20	0.15	15.9	10.6	1.5	1.2	1.025		20	20	0.15	13.001	8.667	1.5	1.11	0.937
25	20	0.15	21.93	11.69	1.875	1.34	1.068		25	20	0.15	17.93	9.56	1.875	1.25	0.98		25	20	0.15	16.03	8.55	1.875	1.2	0.93
30	20	0.15	26.34	11.707	2.25	1.42	1.068		30	20	0.15	21.04	9.35	2.25	1.32	0.97		30	20	0.15	19.67	8.74	2.25	1.29	0.94
