# Supplementary material for: Adsorption of phenol over bio-based silica/calcium carbonate (CS-SiO 2 /CaCO 3 ) nanocomposite synthesized from waste eggshells and rice husks
Source: PeerJ journal article supplement (doi:10.7717/peerj-pchem.17), 2021-03-02
Supplement: XRD_Data.xlsx [file XRD_Data.xlsx]

## Sheet: ESCaCO3
Angle	Intensity
10.0024	149
10.0287	159
10.055	158
10.0812	143
10.1075	169
10.1337	162
10.16	179
10.1863	145
10.2125	153
10.2388	130
10.265	168
10.2913	140
10.3176	182
10.3438	158
10.3701	159
10.3963	175
10.4226	132
10.4489	161
10.4751	157
10.5014	162
10.5276	180
10.5539	170
10.5802	146
10.6064	171
10.6327	138
10.6589	155
10.6852	161
10.7115	165
10.7377	153
10.764	157
10.7902	130
10.8165	157
10.8428	165
10.869	173
10.8953	163
10.9216	176
10.9478	134
10.9741	143
11.0003	155
11.0266	152
11.0529	140
11.0791	144
11.1054	179
11.1316	163
11.1579	171
11.1842	142
11.2104	166
11.2367	167
11.2629	179
11.2892	142
11.3155	165
11.3417	172
11.368	163
11.3942	173
11.4205	176
11.4468	160
11.473	149
11.4993	161
11.5255	160
11.5518	178
11.5781	140
11.6043	183
11.6306	169
11.6568	178
11.6831	158
11.7094	152
11.7356	163
11.7619	166
11.7881	159
11.8144	149
11.8407	161
11.8669	168
11.8932	177
11.9195	174
11.9457	148
11.972	144
11.9982	143
12.0245	166
12.0508	151
12.077	138
12.1033	143
12.1295	122
12.1558	177
12.1821	172
12.2083	163
12.2346	164
12.2608	157
12.2871	148
12.3134	150
12.3396	163
12.3659	160
12.3921	197
12.4184	154
12.4447	171
12.4709	161
12.4972	152
12.5234	190
12.5497	174
12.576	154
12.6022	146
12.6285	187
12.6547	161
12.681	184
12.7073	156
12.7335	157
12.7598	156
12.7861	168
12.8123	170
12.8386	159
12.8648	152
12.8911	164
12.9174	148
12.9436	143
12.9699	161
12.9961	164
13.0224	181
13.0487	168
13.0749	159
13.1012	150
13.1274	157
13.1537	152
13.18	144
13.2062	145
13.2325	170
13.2587	174
13.285	157
13.3113	170
13.3375	182
13.3638	165
13.39	194
13.4163	138
13.4426	156
13.4688	183
13.4951	160
13.5213	164
13.5476	154
13.5739	177
13.6001	164
13.6264	169
13.6526	161
13.6789	162
13.7052	164
13.7314	151
13.7577	175
13.784	194
13.8102	182
13.8365	175
13.8627	172
13.889	176
13.9153	161
13.9415	172
13.9678	177
13.994	165
14.0203	176
14.0466	156
14.0728	172
14.0991	192
14.1253	187
14.1516	140
14.1779	163
14.2041	161
14.2304	162
14.2566	172
14.2829	169
14.3092	180
14.3354	167
14.3617	176
14.3879	179
14.4142	161
14.4405	150
14.4667	155
14.493	161
14.5192	162
14.5455	157
14.5718	158
14.598	177
14.6243	169
14.6506	172
14.6768	178
14.7031	169
14.7293	174
14.7556	155
14.7819	165
14.8081	177
14.8344	158
14.8606	165
14.8869	163
14.9132	168
14.9394	164
14.9657	152
14.9919	158
15.0182	166
15.0445	171
15.0707	146
15.097	170
15.1232	165
15.1495	152
15.1758	169
15.202	165
15.2283	149
15.2545	164
15.2808	161
15.3071	178
15.3333	193
15.3596	174
15.3858	144
15.4121	168
15.4384	173
15.4646	136
15.4909	166
15.5171	158
15.5434	173
15.5697	185
15.5959	176
15.6222	172
15.6485	155
15.6747	160
15.701	164
15.7272	196
15.7535	155
15.7798	173
15.806	150
15.8323	181
15.8585	172
15.8848	178
15.9111	163
15.9373	178
15.9636	167
15.9898	184
16.0161	179
16.0424	147
16.0686	160
16.0949	152
16.1211	140
16.1474	185
16.1737	167
16.1999	156
16.2262	183
16.2524	156
16.2787	150
16.305	162
16.3312	157
16.3575	194
16.3837	199
16.41	163
16.4363	174
16.4625	171
16.4888	150
16.5151	197
16.5413	151
16.5676	146
16.5938	173
16.6201	147
16.6464	155
16.6726	179
16.6989	169
16.7251	145
16.7514	160
16.7777	147
16.8039	186
16.8302	190
16.8564	154
16.8827	166
16.909	195
16.9352	173
16.9615	160
16.9877	173
17.014	188
17.0403	189
17.0665	170
17.0928	166
17.119	163
17.1453	177
17.1716	147
17.1978	167
17.2241	161
17.2503	144
17.2766	161
17.3029	173
17.3291	185
17.3554	160
17.3816	176
17.4079	161
17.4342	161
17.4604	151
17.4867	148
17.513	161
17.5392	167
17.5655	170
17.5917	160
17.618	186
17.6443	164
17.6705	152
17.6968	174
17.723	172
17.7493	150
17.7756	166
17.8018	157
17.8281	155
17.8543	156
17.8806	180
17.9069	157
17.9331	158
17.9594	149
17.9856	150
18.0119	170
18.0382	154
18.0644	155
18.0907	147
18.1169	160
18.1432	158
18.1695	146
18.1957	155
18.222	150
18.2482	159
18.2745	156
18.3008	147
18.327	172
18.3533	167
18.3796	165
18.4058	162
18.4321	164
18.4583	153
18.4846	150
18.5109	173
18.5371	151
18.5634	163
18.5896	173
18.6159	145
18.6422	139
18.6684	168
18.6947	156
18.7209	172
18.7472	147
18.7735	176
18.7997	209
18.826	172
18.8522	175
18.8785	183
18.9048	163
18.931	139
18.9573	146
18.9835	160
19.0098	160
19.0361	158
19.0623	145
19.0886	171
19.1148	171
19.1411	137
19.1674	144
19.1936	164
19.2199	188
19.2461	173
19.2724	152
19.2987	160
19.3249	170
19.3512	154
19.3775	129
19.4037	155
19.43	150
19.4562	171
19.4825	147
19.5088	148
19.535	152
19.5613	165
19.5875	141
19.6138	184
19.6401	180
19.6663	156
19.6926	171
19.7188	143
19.7451	138
19.7714	157
19.7976	153
19.8239	143
19.8501	173
19.8764	150
19.9027	145
19.9289	146
19.9552	132
19.9814	170
20.0077	166
20.034	134
20.0602	168
20.0865	149
20.1127	163
20.139	153
20.1653	128
20.1915	173
20.2178	160
20.2441	176
20.2703	141
20.2966	142
20.3228	164
20.3491	140
20.3754	159
20.4016	173
20.4279	138
20.4541	154
20.4804	155
20.5067	174
20.5329	166
20.5592	166
20.5854	154
20.6117	149
20.638	131
20.6642	174
20.6905	134
20.7167	149
20.743	159
20.7693	158
20.7955	184
20.8218	145
20.848	151
20.8743	147
20.9006	146
20.9268	162
20.9531	146
20.9793	172
21.0056	155
21.0319	169
21.0581	143
21.0844	159
21.1106	158
21.1369	146
21.1632	155
21.1894	144
21.2157	147
21.242	141
21.2682	153
21.2945	167
21.3207	131
21.347	169
21.3733	150
21.3995	124
21.4258	180
21.452	148
21.4783	149
21.5046	151
21.5308	150
21.5571	138
21.5833	152
21.6096	151
21.6359	168
21.6621	142
21.6884	164
21.7146	170
21.7409	151
21.7672	169
21.7934	158
21.8197	132
21.8459	158
21.8722	156
21.8985	161
21.9247	174
21.951	152
21.9772	161
22.0035	155
22.0298	158
22.056	155
22.0823	183
22.1086	172
22.1348	140
22.1611	169
22.1873	143
22.2136	149
22.2399	162
22.2661	152
22.2924	141
22.3186	169
22.3449	141
22.3712	156
22.3974	163
22.4237	182
22.4499	175
22.4762	170
22.5025	125
22.5287	168
22.555	176
22.5812	151
22.6075	146
22.6338	141
22.66	137
22.6863	158
22.7125	157
22.7388	168
22.7651	143
22.7913	171
22.8176	169
22.8438	153
22.8701	169
22.8964	185
22.9226	177
22.9489	205
22.9751	233
23.0014	254
23.0277	244
23.0539	323
23.0802	372
23.1065	429
23.1327	442
23.159	348
23.1852	285
23.2115	222
23.2378	182
23.264	178
23.2903	211
23.3165	150
23.3428	170
23.3691	146
23.3953	157
23.4216	151
23.4478	145
23.4741	153
23.5004	178
23.5266	156
23.5529	139
23.5791	140
23.6054	160
23.6317	153
23.6579	162
23.6842	157
23.7104	165
23.7367	144
23.763	131
23.7892	139
23.8155	154
23.8417	154
23.868	162
23.8943	147
23.9205	145
23.9468	140
23.9731	157
23.9993	153
24.0256	136
24.0518	151
24.0781	152
24.1044	147
24.1306	166
24.1569	152
24.1831	132
24.2094	163
24.2357	124
24.2619	139
24.2882	137
24.3144	141
24.3407	146
24.367	125
24.3932	167
24.4195	133
24.4457	169
24.472	157
24.4983	143
24.5245	165
24.5508	129
24.577	153
24.6033	173
24.6296	138
24.6558	153
24.6821	149
24.7083	158
24.7346	137
24.7609	149
24.7871	147
24.8134	150
24.8396	135
24.8659	164
24.8922	167
24.9184	158
24.9447	149
24.971	133
24.9972	165
25.0235	130
25.0497	141
25.076	115
25.1023	148
25.1285	157
25.1548	134
25.181	161
25.2073	151
25.2336	122
25.2598	121
25.2861	134
25.3123	155
25.3386	153
25.3649	143
25.3911	144
25.4174	131
25.4436	145
25.4699	129
25.4962	130
25.5224	160
25.5487	151
25.5749	146
25.6012	149
25.6275	123
25.6537	144
25.68	148
25.7062	146
25.7325	133
25.7588	146
25.785	141
25.8113	137
25.8376	146
25.8638	151
25.8901	146
25.9163	136
25.9426	129
25.9689	153
25.9951	129
26.0214	153
26.0476	143
26.0739	157
26.1002	138
26.1264	141
26.1527	125
26.1789	141
26.2052	138
26.2315	154
26.2577	154
26.284	155
26.3102	120
26.3365	158
26.3628	134
26.389	150
26.4153	134
26.4415	157
26.4678	166
26.4941	138
26.5203	155
26.5466	147
26.5728	175
26.5991	163
26.6254	173
26.6516	184
26.6779	176
26.7041	156
26.7304	142
26.7567	168
26.7829	144
26.8092	141
26.8355	157
26.8617	133
26.888	148
26.9142	111
26.9405	113
26.9668	141
26.993	160
27.0193	128
27.0455	123
27.0718	118
27.0981	136
27.1243	131
27.1506	142
27.1768	138
27.2031	131
27.2294	142
27.2556	131
27.2819	157
27.3081	160
27.3344	142
27.3607	144
27.3869	145
27.4132	175
27.4394	139
27.4657	150
27.492	134
27.5182	119
27.5445	144
27.5707	159
27.597	157
27.6233	166
27.6495	127
27.6758	155
27.7021	142
27.7283	133
27.7546	130
27.7808	129
27.8071	143
27.8334	155
27.8596	142
27.8859	165
27.9121	156
27.9384	128
27.9647	120
27.9909	134
28.0172	141
28.0434	156
28.0697	155
28.096	132
28.1222	155
28.1485	166
28.1747	148
28.201	130
28.2273	133
28.2535	140
28.2798	128
28.306	129
28.3323	169
28.3586	143
28.3848	130
28.4111	160
28.4373	184
28.4636	158
28.4899	153
28.5161	147
28.5424	170
28.5686	160
28.5949	183
28.6212	153
28.6474	191
28.6737	172
28.7	195
28.7262	183
28.7525	181
28.7787	155
28.805	173
28.8313	186
28.8575	194
28.8838	190
28.91	199
28.9363	207
28.9626	203
28.9888	184
29.0151	268
29.0413	208
29.0676	226
29.0939	244
29.1201	207
29.1464	236
29.1726	304
29.1989	373
29.2252	404
29.2514	422
29.2777	622
29.3039	779
29.3302	927
29.3565	1350
29.3827	1946
29.409	2807
29.4352	4625
29.4615	6024
29.4878	5582
29.514	4399
29.5403	3615
29.5666	2659
29.5928	1511
29.6191	928
29.6453	630
29.6716	513
29.6979	391
29.7241	350
29.7504	319
29.7766	310
29.8029	252
29.8292	279
29.8554	229
29.8817	219
29.9079	185
29.9342	213
29.9605	185
29.9867	181
30.013	184
30.0392	171
30.0655	178
30.0918	139
30.118	206
30.1443	193
30.1705	181
30.1968	166
30.2231	185
30.2493	180
30.2756	165
30.3018	148
30.3281	132
30.3544	155
30.3806	184
30.4069	155
30.4331	152
30.4594	155
30.4857	167
30.5119	168
30.5382	139
30.5645	165
30.5907	148
30.617	147
30.6432	162
30.6695	156
30.6958	176
30.722	145
30.7483	143
30.7745	155
30.8008	147
30.8271	143
30.8533	172
30.8796	158
30.9058	151
30.9321	156
30.9584	156
30.9846	153
31.0109	130
31.0371	150
31.0634	144
31.0897	163
31.1159	139
31.1422	123
31.1684	127
31.1947	153
31.221	171
31.2472	145
31.2735	144
31.2997	150
31.326	169
31.3523	161
31.3785	153
31.4048	177
31.4311	166
31.4573	226
31.4836	245
31.5098	262
31.5361	205
31.5624	237
31.5886	215
31.6149	181
31.6411	176
31.6674	170
31.6937	141
31.7199	147
31.7462	148
31.7724	134
31.7987	149
31.825	133
31.8512	117
31.8775	116
31.9037	143
31.93	139
31.9563	142
31.9825	141
32.0088	130
32.035	139
32.0613	143
32.0876	130
32.1138	122
32.1401	136
32.1663	147
32.1926	154
32.2189	170
32.2451	140
32.2714	142
32.2976	115
32.3239	119
32.3502	142
32.3764	157
32.4027	130
32.429	126
32.4552	149
32.4815	138
32.5077	151
32.534	149
32.5603	153
32.5865	132
32.6128	130
32.639	136
32.6653	144
32.6916	128
32.7178	151
32.7441	126
32.7703	146
32.7966	151
32.8229	152
32.8491	134
32.8754	165
32.9016	124
32.9279	135
32.9542	137
32.9804	137
33.0067	148
33.0329	155
33.0592	143
33.0855	130
33.1117	127
33.138	123
33.1642	136
33.1905	135
33.2168	116
33.243	121
33.2693	119
33.2956	128
33.3218	130
33.3481	131
33.3743	148
33.4006	160
33.4269	150
33.4531	141
33.4794	136
33.5056	123
33.5319	113
33.5582	151
33.5844	136
33.6107	121
33.6369	121
33.6632	135
33.6895	130
33.7157	119
33.742	147
33.7682	109
33.7945	143
33.8208	157
33.847	136
33.8733	142
33.8995	119
33.9258	129
33.9521	143
33.9783	133
34.0046	118
34.0308	128
34.0571	136
34.0834	135
34.1096	135
34.1359	110
34.1622	125
34.1884	125
34.2147	158
34.2409	127
34.2672	138
34.2935	139
34.3197	145
34.346	114
34.3722	123
34.3985	123
34.4248	121
34.451	114
34.4773	116
34.5035	121
34.5298	128
34.5561	130
34.5823	134
34.6086	130
34.6348	113
34.6611	157
34.6874	139
34.7136	128
34.7399	136
34.7661	122
34.7924	112
34.8187	108
34.8449	120
34.8712	137
34.8974	122
34.9237	144
34.95	133
34.9762	130
35.0025	154
35.0287	116
35.055	148
35.0813	115
35.1075	148
35.1338	120
35.1601	116
35.1863	121
35.2126	138
35.2388	131
35.2651	150
35.2914	126
35.3176	147
35.3439	145
35.3701	140
35.3964	139
35.4227	95
35.4489	109
35.4752	119
35.5014	153
35.5277	131
35.554	125
35.5802	148
35.6065	109
35.6327	118
35.659	142
35.6853	141
35.7115	140
35.7378	174
35.764	158
35.7903	159
35.8166	173
35.8428	183
35.8691	191
35.8953	223
35.9216	275
35.9479	353
35.9741	459
36.0004	647
36.0267	777
36.0529	812
36.0792	686
36.1054	558
36.1317	531
36.158	412
36.1842	289
36.2105	228
36.2367	177
36.263	185
36.2893	174
36.3155	157
36.3418	151
36.368	148
36.3943	138
36.4206	106
36.4468	124
36.4731	149
36.4993	149
36.5256	144
36.5519	132
36.5781	131
36.6044	138
36.6306	122
36.6569	131
36.6832	141
36.7094	96
36.7357	113
36.7619	145
36.7882	133
36.8145	145
36.8407	128
36.867	136
36.8932	125
36.9195	127
36.9458	158
36.972	111
36.9983	113
37.0246	145
37.0508	134
37.0771	129
37.1033	108
37.1296	123
37.1559	122
37.1821	130
37.2084	136
37.2346	107
37.2609	120
37.2872	119
37.3134	123
37.3397	118
37.3659	137
37.3922	131
37.4185	125
37.4447	101
37.471	141
37.4972	141
37.5235	127
37.5498	93
37.576	114
37.6023	113
37.6285	133
37.6548	120
37.6811	122
37.7073	128
37.7336	122
37.7598	130
37.7861	122
37.8124	124
37.8386	105
37.8649	114
37.8912	143
37.9174	119
37.9437	116
37.9699	131
37.9962	119
38.0225	127
38.0487	129
38.075	117
38.1012	150
38.1275	132
38.1538	147
38.18	139
38.2063	131
38.2325	119
38.2588	142
38.2851	107
38.3113	118
38.3376	124
38.3638	125
38.3901	152
38.4164	122
38.4426	121
38.4689	128
38.4951	124
38.5214	149
38.5477	141
38.5739	111
38.6002	136
38.6264	142
38.6527	118
38.679	115
38.7052	106
38.7315	135
38.7577	129
38.784	116
38.8103	158
38.8365	107
38.8628	121
38.8891	134
38.9153	127
38.9416	133
38.9678	138
38.9941	151
39.0204	133
39.0466	112
39.0729	146
39.0991	156
39.1254	148
39.1517	162
39.1779	166
39.2042	161
39.2304	165
39.2567	190
39.283	217
39.3092	239
39.3355	280
39.3617	384
39.388	507
39.4143	644
39.4405	856
39.4668	1002
39.493	994
39.5193	945
39.5456	864
39.5718	781
39.5981	679
39.6243	508
39.6506	420
39.6769	286
39.7031	248
39.7294	209
39.7557	203
39.7819	166
39.8082	171
39.8344	155
39.8607	128
39.887	146
39.9132	141
39.9395	135
39.9657	130
39.992	132
40.0183	158
40.0445	120
40.0708	149
40.097	110
40.1233	121
40.1496	114
40.1758	144
40.2021	142
40.2283	132
40.2546	137
40.2809	112
40.3071	144
40.3334	108
40.3596	110
40.3859	127
40.4122	123
40.4384	131
40.4647	136
40.4909	127
40.5172	140
40.5435	113
40.5697	125
40.596	105
40.6222	132
40.6485	142
40.6748	105
40.701	94
40.7273	121
40.7536	130
40.7798	123
40.8061	116
40.8323	127
40.8586	131
40.8849	123
40.9111	157
40.9374	114
40.9636	109
40.9899	118
41.0162	120
41.0424	117
41.0687	133
41.0949	126
41.1212	110
41.1475	119
41.1737	139
41.2	133
41.2262	120
41.2525	118
41.2788	114
41.305	149
41.3313	115
41.3575	107
41.3838	146
41.4101	98
41.4363	119
41.4626	136
41.4888	139
41.5151	121
41.5414	133
41.5676	114
41.5939	115
41.6202	120
41.6464	103
41.6727	101
41.6989	130
41.7252	134
41.7515	118
41.7777	107
41.804	122
41.8302	137
41.8565	134
41.8828	131
41.909	138
41.9353	118
41.9615	135
41.9878	110
42.0141	109
42.0403	117
42.0666	133
42.0928	119
42.1191	120
42.1454	125
42.1716	128
42.1979	126
42.2241	105
42.2504	129
42.2767	118
42.3029	130
42.3292	121
42.3554	139
42.3817	127
42.408	117
42.4342	142
42.4605	140
42.4867	97
42.513	131
42.5393	117
42.5655	105
42.5918	140
42.6181	117
42.6443	112
42.6706	135
42.6968	142
42.7231	138
42.7494	151
42.7756	128
42.8019	135
42.8281	145
42.8544	128
42.8807	137
42.9069	153
42.9332	158
42.9594	156
42.9857	145
43.012	181
43.0382	181
43.0645	213
43.0907	261
43.117	325
43.1433	422
43.1695	571
43.1958	781
43.222	1038
43.2483	953
43.2746	924
43.3008	828
43.3271	790
43.3533	661
43.3796	569
43.4059	408
43.4321	315
43.4584	270
43.4847	236
43.5109	184
43.5372	166
43.5634	160
43.5897	136
43.616	165
43.6422	133
43.6685	152
43.6947	150
43.721	155
43.7473	158
43.7735	152
43.7998	144
43.826	119
43.8523	118
43.8786	120
43.9048	142
43.9311	133
43.9573	139
43.9836	123
44.0099	127
44.0361	133
44.0624	133
44.0886	120
44.1149	118
44.1412	121
44.1674	116
44.1937	138
44.2199	146
44.2462	117
44.2725	140
44.2987	134
44.325	136
44.3512	129
44.3775	130
44.4038	130
44.43	124
44.4563	144
44.4826	115
44.5088	110
44.5351	130
44.5613	106
44.5876	129
44.6139	122
44.6401	107
44.6664	106
44.6926	127
44.7189	114
44.7452	136
44.7714	110
44.7977	133
44.8239	139
44.8502	135
44.8765	103
44.9027	115
44.929	115
44.9552	123
44.9815	149
45.0078	135
45.034	135
45.0603	143
45.0865	117
45.1128	121
45.1391	118
45.1653	125
45.1916	110
45.2178	121
45.2441	117
45.2704	141
45.2966	120
45.3229	109
45.3492	136
45.3754	129
45.4017	117
45.4279	110
45.4542	138
45.4805	133
45.5067	115
45.533	137
45.5592	110
45.5855	126
45.6118	137
45.638	121
45.6643	120
45.6905	126
45.7168	142
45.7431	120
45.7693	131
45.7956	150
45.8218	109
45.8481	138
45.8744	132
45.9006	101
45.9269	134
45.9531	139
45.9794	138
46.0057	132
46.0319	118
46.0582	130
46.0844	140
46.1107	141
46.137	150
46.1632	140
46.1895	130
46.2157	139
46.242	135
46.2683	128
46.2945	104
46.3208	149
46.3471	115
46.3733	127
46.3996	142
46.4258	131
46.4521	126
46.4784	132
46.5046	139
46.5309	163
46.5571	142
46.5834	138
46.6097	141
46.6359	141
46.6622	135
46.6884	136
46.7147	135
46.741	132
46.7672	133
46.7935	157
46.8197	154
46.846	144
46.8723	166
46.8985	166
46.9248	161
46.951	192
46.9773	165
47.0036	165
47.0298	192
47.0561	204
47.0823	264
47.1086	262
47.1349	335
47.1611	362
47.1874	405
47.2137	399
47.2399	409
47.2662	376
47.2924	370
47.3187	327
47.345	392
47.3712	353
47.3975	339
47.4237	355
47.45	434
47.4763	484
47.5025	693
47.5288	890
47.555	1103
47.5813	1192
47.6076	1112
47.6338	1002
47.6601	903
47.6863	883
47.7126	789
47.7389	666
47.7651	493
47.7914	406
47.8176	298
47.8439	255
47.8702	273
47.8964	215
47.9227	231
47.9489	202
47.9752	187
48.0015	181
48.0277	176
48.054	162
48.0802	179
48.1065	176
48.1328	182
48.159	188
48.1853	195
48.2116	156
48.2378	222
48.2641	197
48.2903	251
48.3166	203
48.3429	252
48.3691	235
48.3954	276
48.4216	341
48.4479	386
48.4742	531
48.5004	717
48.5267	1016
48.5529	1280
48.5792	1435
48.6055	1259
48.6317	1184
48.658	1006
48.6842	1000
48.7105	976
48.7368	781
48.763	626
48.7893	411
48.8155	335
48.8418	288
48.8681	226
48.8943	234
48.9206	218
48.9468	214
48.9731	171
48.9994	174
49.0256	163
49.0519	144
49.0782	126
49.1044	134
49.1307	149
49.1569	110
49.1832	136
49.2095	132
49.2357	132
49.262	138
49.2882	142
49.3145	129
49.3408	132
49.367	114
49.3933	108
49.4195	135
49.4458	152
49.4721	132
49.4983	149
49.5246	120
49.5508	131
49.5771	126
49.6034	123
49.6296	123
49.6559	134
49.6821	124
49.7084	114
49.7347	119
49.7609	133
49.7872	149
49.8134	116
49.8397	135
49.866	128
49.8922	115
49.9185	164
49.9447	134
49.971	125
49.9973	130
50.0235	122
50.0498	152
50.0761	146
50.1023	151
50.1286	127
50.1548	140
50.1811	146
50.2074	104
50.2336	124
50.2599	138
50.2861	122
50.3124	124
50.3387	127
50.3649	127
50.3912	108
50.4174	114
50.4437	141
50.47	137
50.4962	120
50.5225	102
50.5487	115
50.575	122
50.6013	126
50.6275	117
50.6538	104
50.68	99
50.7063	107
50.7326	116
50.7588	147
50.7851	104
50.8113	106
50.8376	114
50.8639	110
50.8901	112
50.9164	131
50.9427	115
50.9689	117
50.9952	114
51.0214	130
51.0477	103
51.074	110
51.1002	106
51.1265	118
51.1527	107
51.179	124
51.2053	116
51.2315	135
51.2578	124
51.284	98
51.3103	121
51.3366	128
51.3628	132
51.3891	117
51.4153	130
51.4416	115
51.4679	111
51.4941	115
51.5204	115
51.5466	112
51.5729	118
51.5992	124
51.6254	142
51.6517	115
51.6779	113
51.7042	106
51.7305	98
51.7567	122
51.783	124
51.8092	117
51.8355	138
51.8618	137
51.888	124
51.9143	141
51.9406	110
51.9668	119
51.9931	97
52.0193	117
52.0456	120
52.0719	95
52.0981	119
52.1244	114
52.1506	126
52.1769	121
52.2032	115
52.2294	115
52.2557	117
52.2819	112
52.3082	105
52.3345	130
52.3607	105
52.387	122
52.4132	112
52.4395	109
52.4658	110
52.492	142
52.5183	111
52.5445	92
52.5708	101
52.5971	111
52.6233	124
52.6496	101
52.6758	139
52.7021	121
52.7284	88
52.7546	111
52.7809	139
52.8072	119
52.8334	136
52.8597	101
52.8859	111
52.9122	126
52.9385	131
52.9647	124
52.991	121
53.0172	106
53.0435	104
53.0698	106
53.096	115
53.1223	119
53.1485	120
53.1748	130
53.2011	110
53.2273	141
53.2536	116
53.2798	118
53.3061	128
53.3324	113
53.3586	102
53.3849	122
53.4111	100
53.4374	111
53.4637	90
53.4899	112
53.5162	102
53.5424	126
53.5687	104
53.595	116
53.6212	106
53.6475	104
53.6737	102
53.7	94
53.7263	121
53.7525	112
53.7788	111
53.8051	112
53.8313	107
53.8576	95
53.8838	133
53.9101	105
53.9364	122
53.9626	125
53.9889	110
54.0151	103
54.0414	104
54.0677	106
54.0939	111
54.1202	82
54.1464	122
54.1727	123
54.199	106
54.2252	132
54.2515	97
54.2777	89
54.304	97
54.3303	84
54.3565	106
54.3828	109
54.409	87
54.4353	103
54.4616	108
54.4878	89
54.5141	102
54.5403	116
54.5666	109
54.5929	104
54.6191	121
54.6454	97
54.6717	147
54.6979	104
54.7242	142
54.7504	98
54.7767	126
54.803	103
54.8292	119
54.8555	109
54.8817	104
54.908	138
54.9343	116
54.9605	106
54.9868	92
55.013	118
55.0393	126
55.0656	115
55.0918	130
55.1181	106
55.1443	123
55.1706	100
55.1969	102
55.2231	111
55.2494	110
55.2756	94
55.3019	109
55.3282	106
55.3544	113
55.3807	117
55.4069	122
55.4332	118
55.4595	119
55.4857	130
55.512	127
55.5383	117
55.5645	138
55.5908	107
55.617	141
55.6433	109
55.6696	104
55.6958	123
55.7221	100
55.7483	112
55.7746	117
55.8009	120
55.8271	123
55.8534	129
55.8796	109
55.9059	109
55.9322	123
55.9584	116
55.9847	120
56.0109	131
56.0372	110
56.0635	123
56.0897	103
56.116	109
56.1422	113
56.1685	120
56.1948	112
56.221	124
56.2473	141
56.2735	137
56.2998	123
56.3261	107
56.3523	130
56.3786	146
56.4048	118
56.4311	104
56.4574	130
56.4836	123
56.5099	153
56.5362	173
56.5624	213
56.5887	272
56.6149	310
56.6412	312
56.6675	314
56.6937	276
56.72	291
56.7462	284
56.7725	263
56.7988	259
56.825	231
56.8513	226
56.8775	177
56.9038	174
56.9301	166
56.9563	167
56.9826	136
57.0088	145
57.0351	134
57.0614	136
57.0876	145
57.1139	130
57.1401	127
57.1664	127
57.1927	157
57.2189	159
57.2452	162
57.2714	170
57.2977	158
57.324	196
57.3502	223
57.3765	273
57.4028	385
57.429	538
57.4553	565
57.4815	617
57.5078	626
57.5341	559
57.5603	528
57.5866	492
57.6128	459
57.6391	446
57.6654	429
57.6916	353
57.7179	300
57.7441	216
57.7704	225
57.7967	166
57.8229	167
57.8492	180
57.8754	158
57.9017	163
57.928	134
57.9542	146
57.9805	146
58.0067	146
58.033	114
58.0593	145
58.0855	157
58.1118	173
58.138	179
58.1643	170
58.1906	165
58.2168	182
58.2431	171
58.2693	175
58.2956	162
58.3219	160
58.3481	139
58.3744	142
58.4007	139
58.4269	126
58.4532	138
58.4794	96
58.5057	118
58.532	116
58.5582	127
58.5845	132
58.6107	108
58.637	96
58.6633	110
58.6895	117
58.7158	114
58.742	107
58.7683	114
58.7946	121
58.8208	106
58.8471	102
58.8733	142
58.8996	122
58.9259	124
58.9521	123
58.9784	127
59.0046	123
59.0309	116
59.0572	109
59.0834	112
59.1097	128
59.1359	102
59.1622	114
59.1885	106
59.2147	124
59.241	105
59.2673	102
59.2935	111
59.3198	127
59.346	123
59.3723	112
59.3986	113
59.4248	103
59.4511	124
59.4773	125
59.5036	92
59.5299	91
59.5561	107
59.5824	94
59.6086	107
59.6349	127
59.6612	111
59.6874	127
59.7137	121
59.7399	101
59.7662	116
59.7925	107
59.8187	105
59.845	112
59.8712	125
59.8975	113
59.9238	98
59.95	109
59.9763	114
60.0025	80
60.0288	91
60.0551	116
60.0813	107
60.1076	111
60.1338	112
60.1601	129
60.1864	141
60.2126	93
60.2389	131
60.2652	117
60.2914	133
60.3177	113
60.3439	114
60.3702	123
60.3965	114
60.4227	129
60.449	121
60.4752	138
60.5015	131
60.5278	135
60.554	147
60.5803	149
60.6065	175
60.6328	206
60.6591	257
60.6853	360
60.7116	448
60.7378	511
60.7641	440
60.7904	438
60.8166	356
60.8429	375
60.8691	348
60.8954	380
60.9217	352
60.9479	330
60.9742	347
61.0004	318
61.0267	346
61.053	277
61.0792	317
61.1055	270
61.1318	277
61.158	241
61.1843	267
61.2105	250
61.2368	261
61.2631	236
61.2893	213
61.3156	221
61.3418	189
61.3681	186
61.3944	223
61.4206	256
61.4469	263
61.4731	246
61.4994	241
61.5257	228
61.5519	196
61.5782	232
61.6044	234
61.6307	211
61.657	163
61.6832	164
61.7095	136
61.7357	156
61.762	156
61.7883	140
61.8145	133
61.8408	145
61.867	140
61.8933	113
61.9196	116
61.9458	114
61.9721	96
61.9983	125
62.0246	136
62.0509	95
62.0771	136
62.1034	119
62.1297	111
62.1559	114
62.1822	135
62.2084	111
62.2347	126
62.261	125
62.2872	115
62.3135	126
62.3397	108
62.366	117
62.3923	115
62.4185	134
62.4448	138
62.471	114
[truncated: 667 more rows]

## Sheet: RHSiO2
Angle	Intensity
10.0024	242
10.0287	246
10.055	243
10.0812	246
10.1075	254
10.1337	276
10.16	260
10.1863	237
10.2125	263
10.2388	230
10.265	284
10.2913	264
10.3176	267
10.3438	251
10.3701	239
10.3963	208
10.4226	274
10.4489	287
10.4751	212
10.5014	236
10.5276	238
10.5539	257
10.5802	287
10.6064	263
10.6327	232
10.6589	257
10.6852	247
10.7115	282
10.7377	252
10.764	238
10.7902	225
10.8165	220
10.8428	272
10.869	273
10.8953	266
10.9216	277
10.9478	254
10.9741	264
11.0003	259
11.0266	265
11.0529	244
11.0791	261
11.1054	258
11.1316	279
11.1579	261
11.1842	289
11.2104	216
11.2367	265
11.2629	251
11.2892	255
11.3155	248
11.3417	259
11.368	243
11.3942	242
11.4205	294
11.4468	246
11.473	248
11.4993	258
11.5255	257
11.5518	239
11.5781	287
11.6043	230
11.6306	260
11.6568	223
11.6831	243
11.7094	273
11.7356	234
11.7619	250
11.7881	237
11.8144	256
11.8407	253
11.8669	239
11.8932	261
11.9195	247
11.9457	244
11.972	258
11.9982	264
12.0245	235
12.0508	263
12.077	285
12.1033	255
12.1295	227
12.1558	237
12.1821	223
12.2083	281
12.2346	241
12.2608	219
12.2871	267
12.3134	257
12.3396	221
12.3659	243
12.3921	269
12.4184	262
12.4447	282
12.4709	278
12.4972	232
12.5234	256
12.5497	242
12.576	255
12.6022	268
12.6285	257
12.6547	259
12.681	245
12.7073	266
12.7335	246
12.7598	232
12.7861	253
12.8123	295
12.8386	263
12.8648	261
12.8911	234
12.9174	235
12.9436	217
12.9699	243
12.9961	252
13.0224	222
13.0487	234
13.0749	273
13.1012	227
13.1274	252
13.1537	206
13.18	267
13.2062	243
13.2325	239
13.2587	270
13.285	284
13.3113	261
13.3375	245
13.3638	262
13.39	260
13.4163	239
13.4426	290
13.4688	248
13.4951	246
13.5213	296
13.5476	246
13.5739	266
13.6001	259
13.6264	293
13.6526	261
13.6789	252
13.7052	256
13.7314	248
13.7577	268
13.784	219
13.8102	277
13.8365	263
13.8627	269
13.889	253
13.9153	257
13.9415	263
13.9678	235
13.994	255
14.0203	273
14.0466	270
14.0728	255
14.0991	232
14.1253	255
14.1516	270
14.1779	252
14.2041	254
14.2304	245
14.2566	287
14.2829	259
14.3092	278
14.3354	272
14.3617	244
14.3879	254
14.4142	234
14.4405	291
14.4667	247
14.493	278
14.5192	269
14.5455	255
14.5718	238
14.598	281
14.6243	273
14.6506	269
14.6768	284
14.7031	275
14.7293	282
14.7556	272
14.7819	268
14.8081	273
14.8344	283
14.8606	283
14.8869	271
14.9132	274
14.9394	262
14.9657	250
14.9919	276
15.0182	242
15.0445	258
15.0707	277
15.097	261
15.1232	267
15.1495	290
15.1758	283
15.202	264
15.2283	276
15.2545	247
15.2808	269
15.3071	263
15.3333	250
15.3596	261
15.3858	253
15.4121	290
15.4384	262
15.4646	268
15.4909	249
15.5171	248
15.5434	251
15.5697	248
15.5959	295
15.6222	262
15.6485	281
15.6747	267
15.701	280
15.7272	247
15.7535	276
15.7798	294
15.806	262
15.8323	277
15.8585	289
15.8848	246
15.9111	261
15.9373	270
15.9636	283
15.9898	291
16.0161	300
16.0424	291
16.0686	291
16.0949	289
16.1211	284
16.1474	280
16.1737	284
16.1999	284
16.2262	267
16.2524	265
16.2787	282
16.305	306
16.3312	285
16.3575	272
16.3837	270
16.41	287
16.4363	283
16.4625	254
16.4888	283
16.5151	285
16.5413	292
16.5676	309
16.5938	291
16.6201	291
16.6464	303
16.6726	305
16.6989	312
16.7251	328
16.7514	272
16.7777	298
16.8039	312
16.8302	289
16.8564	266
16.8827	305
16.909	304
16.9352	306
16.9615	294
16.9877	322
17.014	303
17.0403	291
17.0665	305
17.0928	294
17.119	303
17.1453	306
17.1716	287
17.1978	309
17.2241	309
17.2503	305
17.2766	315
17.3029	330
17.3291	303
17.3554	308
17.3816	285
17.4079	328
17.4342	305
17.4604	273
17.4867	318
17.513	296
17.5392	332
17.5655	335
17.5917	317
17.618	315
17.6443	297
17.6705	339
17.6968	317
17.723	320
17.7493	339
17.7756	292
17.8018	301
17.8281	296
17.8543	309
17.8806	302
17.9069	317
17.9331	328
17.9594	314
17.9856	369
18.0119	319
18.0382	323
18.0644	343
18.0907	340
18.1169	342
18.1432	345
18.1695	347
18.1957	326
18.222	330
18.2482	309
18.2745	349
18.3008	325
18.327	377
18.3533	338
18.3796	308
18.4058	335
18.4321	338
18.4583	352
18.4846	355
18.5109	343
18.5371	339
18.5634	302
18.5896	346
18.6159	336
18.6422	325
18.6684	347
18.6947	316
18.7209	323
18.7472	375
18.7735	335
18.7997	355
18.826	340
18.8522	341
18.8785	384
18.9048	352
18.931	340
18.9573	382
18.9835	359
19.0098	384
19.0361	382
19.0623	310
19.0886	339
19.1148	383
19.1411	393
19.1674	349
19.1936	359
19.2199	353
19.2461	329
19.2724	373
19.2987	375
19.3249	366
19.3512	377
19.3775	373
19.4037	368
19.43	385
19.4562	359
19.4825	363
19.5088	390
19.535	384
19.5613	373
19.5875	391
19.6138	398
19.6401	385
19.6663	407
19.6926	400
19.7188	384
19.7451	411
19.7714	381
19.7976	404
19.8239	383
19.8501	420
19.8764	431
19.9027	421
19.9289	399
19.9552	365
19.9814	386
20.0077	400
20.034	388
20.0602	401
20.0865	417
20.1127	425
20.139	397
20.1653	382
20.1915	440
20.2178	389
20.2441	429
20.2703	419
20.2966	436
20.3228	452
20.3491	422
20.3754	407
20.4016	394
20.4279	433
20.4541	444
20.4804	387
20.5067	418
20.5329	405
20.5592	404
20.5854	410
20.6117	412
20.638	400
20.6642	415
20.6905	483
20.7167	413
20.743	409
20.7693	437
20.7955	440
20.8218	375
20.848	435
20.8743	430
20.9006	407
20.9268	448
20.9531	473
20.9793	392
21.0056	437
21.0319	464
21.0581	463
21.0844	425
21.1106	440
21.1369	449
21.1632	446
21.1894	441
21.2157	443
21.242	392
21.2682	426
21.2945	443
21.3207	440
21.347	441
21.3733	442
21.3995	398
21.4258	437
21.452	455
21.4783	455
21.5046	468
21.5308	438
21.5571	431
21.5833	451
21.6096	426
21.6359	436
21.6621	609
21.6884	540
21.7146	521
21.7409	492
21.7672	465
21.7934	451
21.8197	456
21.8459	433
21.8722	443
21.8985	458
21.9247	450
21.951	474
21.9772	470
22.0035	414
22.0298	432
22.056	457
22.0823	529
22.1086	488
22.1348	465
22.1611	370
22.1873	429
22.2136	457
22.2399	423
22.2661	453
22.2924	476
22.3186	422
22.3449	494
22.3712	459
22.3974	462
22.4237	417
22.4499	431
22.4762	448
22.5025	448
22.5287	469
22.555	458
22.5812	467
22.6075	411
22.6338	449
22.66	413
22.6863	445
22.7125	425
22.7388	469
22.7651	483
22.7913	476
22.8176	452
22.8438	429
22.8701	450
22.8964	443
22.9226	421
22.9489	449
22.9751	454
23.0014	453
23.0277	434
23.0539	434
23.0802	443
23.1065	448
23.1327	407
23.159	423
23.1852	442
23.2115	418
23.2378	459
23.264	462
23.2903	439
23.3165	451
23.3428	433
23.3691	438
23.3953	405
23.4216	415
23.4478	425
23.4741	448
23.5004	406
23.5266	431
23.5529	435
23.5791	448
23.6054	436
23.6317	455
23.6579	469
23.6842	442
23.7104	442
23.7367	444
23.763	396
23.7892	402
23.8155	431
23.8417	410
23.868	413
23.8943	424
23.9205	455
23.9468	418
23.9731	398
23.9993	418
24.0256	407
24.0518	425
24.0781	429
24.1044	387
24.1306	418
24.1569	413
24.1831	428
24.2094	407
24.2357	429
24.2619	388
24.2882	417
24.3144	450
24.3407	400
24.367	426
24.3932	395
24.4195	392
24.4457	416
24.472	411
24.4983	393
24.5245	433
24.5508	399
24.577	401
24.6033	364
24.6296	409
24.6558	424
24.6821	428
24.7083	434
24.7346	369
24.7609	383
24.7871	413
24.8134	386
24.8396	396
24.8659	414
24.8922	423
24.9184	420
24.9447	401
24.971	405
24.9972	383
25.0235	405
25.0497	361
25.076	372
25.1023	403
25.1285	385
25.1548	392
25.181	385
25.2073	401
25.2336	397
25.2598	401
25.2861	384
25.3123	364
25.3386	375
25.3649	378
25.3911	374
25.4174	395
25.4436	404
25.4699	377
25.4962	428
25.5224	391
25.5487	391
25.5749	414
25.6012	355
25.6275	373
25.6537	372
25.68	346
25.7062	396
25.7325	362
25.7588	367
25.785	396
25.8113	367
25.8376	408
25.8638	355
25.8901	348
25.9163	347
25.9426	366
25.9689	388
25.9951	327
26.0214	374
26.0476	368
26.0739	377
26.1002	350
26.1264	358
26.1527	354
26.1789	382
26.2052	331
26.2315	358
26.2577	377
26.284	381
26.3102	365
26.3365	371
26.3628	371
26.389	364
26.4153	365
26.4415	375
26.4678	390
26.4941	390
26.5203	401
26.5466	356
26.5728	346
26.5991	331
26.6254	376
26.6516	382
26.6779	410
26.7041	356
26.7304	396
26.7567	371
26.7829	383
26.8092	415
26.8355	335
26.8617	377
26.888	358
26.9142	330
26.9405	348
26.9668	346
26.993	344
27.0193	352
27.0455	355
27.0718	354
27.0981	361
27.1243	385
27.1506	317
27.1768	332
27.2031	318
27.2294	348
27.2556	320
27.2819	350
27.3081	359
27.3344	320
27.3607	351
27.3869	359
27.4132	336
27.4394	324
27.4657	360
27.492	317
27.5182	357
27.5445	334
27.5707	337
27.597	337
27.6233	326
27.6495	331
27.6758	337
27.7021	399
27.7283	311
27.7546	303
27.7808	306
27.8071	315
27.8334	400
27.8596	323
27.8859	329
27.9121	350
27.9384	337
27.9647	338
27.9909	298
28.0172	316
28.0434	325
28.0697	327
28.096	309
28.1222	320
28.1485	341
28.1747	307
28.201	304
28.2273	290
28.2535	319
28.2798	329
28.306	304
28.3323	332
28.3586	297
28.3848	341
28.4111	282
28.4373	306
28.4636	305
28.4899	341
28.5161	299
28.5424	284
28.5686	288
28.5949	314
28.6212	313
28.6474	282
28.6737	311
28.7	304
28.7262	317
28.7525	301
28.7787	289
28.805	302
28.8313	267
28.8575	340
28.8838	318
28.91	316
28.9363	300
28.9626	310
28.9888	344
29.0151	269
29.0413	320
29.0676	310
29.0939	275
29.1201	301
29.1464	311
29.1726	320
29.1989	352
29.2252	292
29.2514	313
29.2777	316
29.3039	305
29.3302	288
29.3565	297
29.3827	277
29.409	295
29.4352	289
29.4615	275
29.4878	271
29.514	273
29.5403	302
29.5666	300
29.5928	265
29.6191	310
29.6453	283
29.6716	299
29.6979	297
29.7241	312
29.7504	324
29.7766	301
29.8029	279
29.8292	307
29.8554	264
29.8817	277
29.9079	259
29.9342	315
29.9605	292
29.9867	285
30.013	296
30.0392	296
30.0655	307
30.0918	254
30.118	307
30.1443	286
30.1705	317
30.1968	298
30.2231	288
30.2493	291
30.2756	273
30.3018	282
30.3281	295
30.3544	314
30.3806	266
30.4069	293
30.4331	281
30.4594	268
30.4857	287
30.5119	270
30.5382	297
30.5645	270
30.5907	289
30.617	275
30.6432	270
30.6695	279
30.6958	275
30.722	268
30.7483	274
30.7745	314
30.8008	273
30.8271	279
30.8533	295
30.8796	307
30.9058	264
30.9321	288
30.9584	281
30.9846	284
31.0109	250
31.0371	302
31.0634	289
31.0897	300
31.1159	290
31.1422	290
31.1684	265
31.1947	249
31.221	283
31.2472	280
31.2735	257
31.2997	261
31.326	292
31.3523	277
31.3785	245
31.4048	281
31.4311	270
31.4573	270
31.4836	319
31.5098	264
31.5361	277
31.5624	237
31.5886	289
31.6149	303
31.6411	238
31.6674	254
31.6937	280
31.7199	281
31.7462	298
31.7724	270
31.7987	273
31.825	247
31.8512	295
31.8775	270
31.9037	260
31.93	260
31.9563	293
31.9825	233
32.0088	278
32.035	266
32.0613	244
32.0876	273
32.1138	265
32.1401	277
32.1663	272
32.1926	285
32.2189	259
32.2451	253
32.2714	238
32.2976	289
32.3239	253
32.3502	268
32.3764	278
32.4027	295
32.429	274
32.4552	261
32.4815	284
32.5077	279
32.534	289
32.5603	261
32.5865	248
32.6128	254
32.639	260
32.6653	270
32.6916	259
32.7178	290
32.7441	204
32.7703	296
32.7966	317
32.8229	262
32.8491	273
32.8754	280
32.9016	268
32.9279	235
32.9542	243
32.9804	256
33.0067	259
33.0329	258
33.0592	270
33.0855	250
33.1117	274
33.138	291
33.1642	275
33.1905	292
33.2168	250
33.243	218
33.2693	227
33.2956	272
33.3218	273
33.3481	269
33.3743	260
33.4006	270
33.4269	253
33.4531	261
33.4794	258
33.5056	257
33.5319	297
33.5582	244
33.5844	254
33.6107	264
33.6369	270
33.6632	232
33.6895	252
33.7157	243
33.742	254
33.7682	270
33.7945	252
33.8208	254
33.847	257
33.8733	267
33.8995	274
33.9258	258
33.9521	256
33.9783	234
34.0046	244
34.0308	275
34.0571	210
34.0834	268
34.1096	231
34.1359	266
34.1622	241
34.1884	254
34.2147	239
34.2409	285
34.2672	238
34.2935	260
34.3197	238
34.346	255
34.3722	280
34.3985	282
34.4248	254
34.451	230
34.4773	295
34.5035	271
34.5298	262
34.5561	263
34.5823	258
34.6086	278
34.6348	243
34.6611	217
34.6874	266
34.7136	250
34.7399	224
34.7661	261
34.7924	262
34.8187	237
34.8449	257
34.8712	251
34.8974	249
34.9237	248
34.95	234
34.9762	262
35.0025	275
35.0287	228
35.055	254
35.0813	253
35.1075	242
35.1338	211
35.1601	279
35.1863	261
35.2126	264
35.2388	255
35.2651	237
35.2914	237
35.3176	237
35.3439	231
35.3701	236
35.3964	269
35.4227	210
35.4489	267
35.4752	252
35.5014	245
35.5277	236
35.554	228
35.5802	236
35.6065	250
35.6327	245
35.659	250
35.6853	270
35.7115	252
35.7378	267
35.764	234
35.7903	247
35.8166	228
35.8428	276
35.8691	263
35.8953	221
35.9216	210
35.9479	249
35.9741	258
36.0004	218
36.0267	222
36.0529	228
36.0792	255
36.1054	217
36.1317	241
36.158	231
36.1842	236
36.2105	227
36.2367	229
36.263	224
36.2893	287
36.3155	239
36.3418	243
36.368	246
36.3943	255
36.4206	225
36.4468	236
36.4731	239
36.4993	248
36.5256	244
36.5519	265
36.5781	248
36.6044	247
36.6306	244
36.6569	255
36.6832	257
36.7094	233
36.7357	255
36.7619	252
36.7882	234
36.8145	244
36.8407	247
36.867	241
36.8932	233
36.9195	233
36.9458	232
36.972	257
36.9983	241
37.0246	252
37.0508	241
37.0771	231
37.1033	223
37.1296	225
37.1559	243
37.1821	233
37.2084	239
37.2346	240
37.2609	238
37.2872	251
37.3134	227
37.3397	228
37.3659	256
37.3922	237
37.4185	253
37.4447	245
37.471	251
37.4972	224
37.5235	258
37.5498	227
37.576	236
37.6023	221
37.6285	245
37.6548	209
37.6811	275
37.7073	222
37.7336	270
37.7598	221
37.7861	219
37.8124	219
37.8386	241
37.8649	246
37.8912	217
37.9174	223
37.9437	251
37.9699	203
37.9962	227
38.0225	224
38.0487	233
38.075	208
38.1012	203
38.1275	199
38.1538	202
38.18	256
38.2063	233
38.2325	201
38.2588	207
38.2851	234
38.3113	194
38.3376	224
38.3638	207
38.3901	212
38.4164	220
38.4426	232
38.4689	239
38.4951	250
38.5214	215
38.5477	238
38.5739	225
38.6002	230
38.6264	249
38.6527	244
38.679	199
38.7052	255
38.7315	251
38.7577	236
38.784	219
38.8103	216
38.8365	222
38.8628	206
38.8891	226
38.9153	245
38.9416	203
38.9678	224
38.9941	227
39.0204	226
39.0466	239
39.0729	229
39.0991	212
39.1254	264
39.1517	199
39.1779	206
39.2042	233
39.2304	209
39.2567	205
39.283	214
39.3092	203
39.3355	227
39.3617	218
39.388	209
39.4143	210
39.4405	239
39.4668	218
39.493	234
39.5193	231
39.5456	220
39.5718	234
39.5981	236
39.6243	225
39.6506	203
39.6769	243
39.7031	211
39.7294	224
39.7557	221
39.7819	234
39.8082	231
39.8344	194
39.8607	219
39.887	219
39.9132	222
39.9395	206
39.9657	207
39.992	213
40.0183	213
40.0445	239
40.0708	261
40.097	216
40.1233	204
40.1496	236
40.1758	255
40.2021	213
40.2283	214
40.2546	199
40.2809	225
40.3071	241
40.3334	227
40.3596	218
40.3859	244
40.4122	233
40.4384	217
40.4647	236
40.4909	208
40.5172	197
40.5435	218
40.5697	191
40.596	225
40.6222	224
40.6485	209
40.6748	230
40.701	214
40.7273	235
40.7536	247
40.7798	228
40.8061	261
40.8323	217
40.8586	206
40.8849	217
40.9111	212
40.9374	212
40.9636	223
40.9899	224
41.0162	230
41.0424	214
41.0687	234
41.0949	234
41.1212	220
41.1475	227
41.1737	210
41.2	229
41.2262	207
41.2525	194
41.2788	239
41.305	229
41.3313	205
41.3575	229
41.3838	234
41.4101	194
41.4363	213
41.4626	202
41.4888	256
41.5151	189
41.5414	192
41.5676	219
41.5939	217
41.6202	215
41.6464	247
41.6727	227
41.6989	230
41.7252	221
41.7515	221
41.7777	200
41.804	232
41.8302	209
41.8565	233
41.8828	208
41.909	216
41.9353	217
41.9615	247
41.9878	247
42.0141	246
42.0403	214
42.0666	234
42.0928	240
42.1191	251
42.1454	205
42.1716	230
42.1979	236
42.2241	218
42.2504	253
42.2767	258
42.3029	208
42.3292	222
42.3554	225
42.3817	223
42.408	252
42.4342	223
42.4605	238
42.4867	208
42.513	217
42.5393	238
42.5655	235
42.5918	223
42.6181	232
42.6443	202
42.6706	210
42.6968	184
42.7231	209
42.7494	234
42.7756	222
42.8019	244
42.8281	220
42.8544	223
42.8807	261
42.9069	216
42.9332	222
42.9594	225
42.9857	224
43.012	223
43.0382	187
43.0645	222
43.0907	280
43.117	238
43.1433	208
43.1695	202
43.1958	227
43.222	230
43.2483	210
43.2746	199
43.3008	237
43.3271	244
43.3533	226
43.3796	221
43.4059	205
43.4321	255
43.4584	252
43.4847	232
43.5109	230
43.5372	239
43.5634	238
43.5897	218
43.616	261
43.6422	251
43.6685	205
43.6947	227
43.721	216
43.7473	220
43.7735	247
43.7998	227
43.826	194
43.8523	202
43.8786	243
43.9048	269
43.9311	244
43.9573	225
43.9836	205
44.0099	229
44.0361	186
44.0624	203
44.0886	216
44.1149	222
44.1412	246
44.1674	219
44.1937	225
44.2199	221
44.2462	222
44.2725	232
44.2987	229
44.325	227
44.3512	210
44.3775	228
44.4038	246
44.43	203
44.4563	233
44.4826	201
44.5088	202
44.5351	224
44.5613	209
44.5876	234
44.6139	216
44.6401	218
44.6664	212
44.6926	242
44.7189	218
44.7452	193
44.7714	213
44.7977	219
44.8239	226
44.8502	224
44.8765	211
44.9027	224
44.929	233
44.9552	208
44.9815	235
45.0078	233
45.034	225
45.0603	229
45.0865	224
45.1128	222
45.1391	234
45.1653	255
45.1916	203
45.2178	228
45.2441	209
45.2704	219
45.2966	240
45.3229	208
45.3492	217
45.3754	240
45.4017	230
45.4279	220
45.4542	237
45.4805	213
45.5067	202
45.533	234
45.5592	229
45.5855	215
45.6118	222
45.638	232
45.6643	192
45.6905	243
45.7168	208
45.7431	214
45.7693	242
45.7956	235
45.8218	225
45.8481	227
45.8744	223
45.9006	205
45.9269	212
45.9531	218
45.9794	226
46.0057	213
46.0319	203
46.0582	231
46.0844	223
46.1107	227
46.137	227
46.1632	225
46.1895	238
46.2157	218
46.242	230
46.2683	260
46.2945	231
46.3208	196
46.3471	219
46.3733	227
46.3996	220
46.4258	224
46.4521	209
46.4784	210
46.5046	266
46.5309	215
46.5571	225
46.5834	247
46.6097	231
46.6359	253
46.6622	203
46.6884	225
46.7147	252
46.741	220
46.7672	206
46.7935	207
46.8197	233
46.846	223
46.8723	219
46.8985	219
46.9248	218
46.951	221
46.9773	208
47.0036	248
47.0298	233
47.0561	214
47.0823	236
47.1086	207
47.1349	249
47.1611	237
47.1874	223
47.2137	217
47.2399	223
47.2662	238
47.2924	247
47.3187	241
47.345	221
47.3712	239
47.3975	217
47.4237	250
47.45	236
47.4763	231
47.5025	243
47.5288	220
47.555	240
47.5813	218
47.6076	241
47.6338	218
47.6601	219
47.6863	210
47.7126	244
47.7389	233
47.7651	223
47.7914	235
47.8176	221
47.8439	240
47.8702	213
47.8964	213
47.9227	226
47.9489	209
47.9752	198
48.0015	237
48.0277	212
48.054	236
48.0802	213
48.1065	189
48.1328	211
48.159	236
48.1853	244
48.2116	209
48.2378	246
48.2641	214
48.2903	213
48.3166	223
48.3429	214
48.3691	217
48.3954	224
48.4216	239
48.4479	218
48.4742	197
48.5004	212
48.5267	211
48.5529	235
48.5792	202
48.6055	218
48.6317	239
48.658	225
48.6842	227
48.7105	224
48.7368	236
48.763	207
48.7893	247
48.8155	229
48.8418	241
48.8681	231
48.8943	215
48.9206	219
48.9468	227
48.9731	218
48.9994	202
49.0256	226
49.0519	220
49.0782	225
49.1044	202
49.1307	256
49.1569	239
49.1832	236
49.2095	218
49.2357	216
49.262	221
49.2882	227
49.3145	197
49.3408	199
49.367	252
49.3933	210
49.4195	212
49.4458	192
49.4721	211
49.4983	225
49.5246	239
49.5508	227
49.5771	230
49.6034	227
49.6296	233
49.6559	188
49.6821	219
49.7084	210
49.7347	251
49.7609	206
49.7872	217
49.8134	235
49.8397	227
49.866	213
49.8922	218
49.9185	207
49.9447	245
49.971	195
49.9973	245
50.0235	223
50.0498	235
50.0761	233
50.1023	220
50.1286	215
50.1548	203
50.1811	200
50.2074	244
50.2336	245
50.2599	246
50.2861	243
50.3124	226
50.3387	216
50.3649	218
50.3912	221
50.4174	206
50.4437	218
50.47	210
50.4962	208
50.5225	264
50.5487	223
50.575	208
50.6013	240
50.6275	232
50.6538	236
50.68	210
50.7063	202
50.7326	245
50.7588	230
50.7851	200
50.8113	216
50.8376	225
50.8639	203
50.8901	223
50.9164	225
50.9427	205
50.9689	219
50.9952	228
51.0214	182
51.0477	237
51.074	258
51.1002	229
51.1265	256
51.1527	212
51.179	228
51.2053	228
51.2315	247
51.2578	229
51.284	258
51.3103	221
51.3366	227
51.3628	221
51.3891	203
51.4153	229
51.4416	234
51.4679	214
51.4941	224
51.5204	218
51.5466	228
51.5729	218
51.5992	222
51.6254	235
51.6517	208
51.6779	201
51.7042	235
51.7305	215
51.7567	217
51.783	216
51.8092	242
51.8355	215
51.8618	231
51.888	223
51.9143	208
51.9406	225
51.9668	221
51.9931	217
52.0193	260
52.0456	229
52.0719	228
52.0981	229
52.1244	229
52.1506	227
52.1769	220
52.2032	214
52.2294	217
52.2557	225
52.2819	253
52.3082	220
52.3345	231
52.3607	230
52.387	217
52.4132	245
52.4395	223
52.4658	217
52.492	246
52.5183	197
52.5445	211
52.5708	213
52.5971	250
52.6233	235
52.6496	227
52.6758	248
52.7021	229
52.7284	220
52.7546	200
52.7809	244
52.8072	234
52.8334	188
52.8597	230
52.8859	197
52.9122	230
52.9385	246
52.9647	210
52.991	224
53.0172	209
53.0435	222
53.0698	237
53.096	219
53.1223	224
53.1485	231
53.1748	205
53.2011	216
53.2273	220
53.2536	218
53.2798	216
53.3061	225
53.3324	234
53.3586	235
53.3849	224
53.4111	201
53.4374	217
53.4637	224
53.4899	242
53.5162	213
53.5424	222
53.5687	204
53.595	254
53.6212	243
53.6475	234
53.6737	225
53.7	239
53.7263	236
53.7525	225
53.7788	225
53.8051	226
53.8313	236
53.8576	226
53.8838	228
53.9101	244
53.9364	215
53.9626	226
53.9889	219
54.0151	232
54.0414	207
54.0677	238
54.0939	226
54.1202	248
54.1464	221
54.1727	220
54.199	209
54.2252	191
54.2515	249
54.2777	237
54.304	212
54.3303	218
54.3565	247
54.3828	218
54.409	209
54.4353	213
54.4616	222
54.4878	224
54.5141	230
54.5403	236
54.5666	213
54.5929	254
54.6191	211
54.6454	210
54.6717	257
54.6979	242
54.7242	233
54.7504	219
54.7767	215
54.803	228
54.8292	231
54.8555	215
54.8817	216
54.908	228
54.9343	200
54.9605	235
54.9868	246
55.013	217
55.0393	245
55.0656	243
55.0918	198
55.1181	229
55.1443	227
55.1706	226
55.1969	228
55.2231	239
55.2494	249
55.2756	261
55.3019	236
55.3282	194
55.3544	248
55.3807	242
55.4069	235
55.4332	227
55.4595	219
55.4857	229
55.512	209
55.5383	221
55.5645	251
55.5908	198
55.617	216
55.6433	223
55.6696	209
55.6958	242
55.7221	223
55.7483	224
55.7746	236
55.8009	216
55.8271	204
55.8534	209
55.8796	220
55.9059	229
55.9322	203
55.9584	246
55.9847	209
56.0109	194
56.0372	210
56.0635	211
56.0897	256
56.116	239
56.1422	255
56.1685	276
56.1948	256
56.221	228
56.2473	255
56.2735	236
56.2998	234
56.3261	235
56.3523	236
56.3786	239
56.4048	241
56.4311	239
56.4574	233
56.4836	223
56.5099	226
56.5362	218
56.5624	219
56.5887	250
56.6149	203
56.6412	220
56.6675	252
56.6937	231
56.72	219
56.7462	223
56.7725	226
56.7988	218
56.825	202
56.8513	224
56.8775	247
56.9038	230
56.9301	236
56.9563	210
56.9826	231
57.0088	274
57.0351	222
57.0614	217
57.0876	251
57.1139	213
57.1401	208
57.1664	216
57.1927	243
57.2189	207
57.2452	215
57.2714	252
57.2977	208
57.324	235
57.3502	233
57.3765	225
57.4028	243
57.429	235
57.4553	231
57.4815	211
57.5078	204
57.5341	195
57.5603	199
57.5866	216
57.6128	228
57.6391	217
57.6654	231
57.6916	246
57.7179	254
57.7441	221
57.7704	230
57.7967	238
57.8229	246
57.8492	193
57.8754	245
57.9017	231
57.928	250
57.9542	237
57.9805	242
58.0067	188
58.033	262
58.0593	259
58.0855	197
58.1118	212
58.138	220
58.1643	233
58.1906	223
58.2168	221
58.2431	251
58.2693	233
58.2956	232
58.3219	250
58.3481	229
58.3744	214
58.4007	203
58.4269	216
58.4532	226
58.4794	255
58.5057	253
58.532	241
58.5582	235
58.5845	283
58.6107	225
58.637	244
58.6633	231
58.6895	226
58.7158	224
58.742	200
58.7683	259
58.7946	236
58.8208	221
58.8471	237
58.8733	224
58.8996	208
58.9259	220
58.9521	224
58.9784	219
59.0046	248
59.0309	246
59.0572	221
59.0834	222
59.1097	235
59.1359	233
59.1622	252
59.1885	252
59.2147	225
59.241	212
59.2673	203
59.2935	252
59.3198	239
59.346	213
59.3723	229
59.3986	226
59.4248	190
59.4511	241
59.4773	215
59.5036	265
59.5299	231
59.5561	228
59.5824	257
59.6086	242
59.6349	226
59.6612	244
59.6874	232
59.7137	229
59.7399	234
59.7662	221
59.7925	224
59.8187	252
59.845	251
59.8712	265
59.8975	235
59.9238	227
59.95	230
59.9763	248
60.0025	213
60.0288	225
60.0551	224
60.0813	231
60.1076	256
60.1338	231
60.1601	213
60.1864	256
60.2126	209
60.2389	268
60.2652	257
60.2914	241
60.3177	227
60.3439	264
60.3702	213
60.3965	247
60.4227	230
60.449	232
60.4752	246
60.5015	228
60.5278	221
60.554	240
60.5803	260
60.6065	225
60.6328	230
60.6591	242
60.6853	228
60.7116	222
60.7378	250
60.7641	211
60.7904	216
60.8166	219
60.8429	218
60.8691	232
60.8954	251
60.9217	246
60.9479	218
60.9742	260
61.0004	209
61.0267	238
61.053	235
61.0792	244
61.1055	228
61.1318	249
61.158	245
61.1843	232
61.2105	253
61.2368	243
61.2631	262
61.2893	251
61.3156	232
61.3418	237
61.3681	230
61.3944	249
61.4206	241
61.4469	263
61.4731	240
61.4994	256
61.5257	249
61.5519	249
61.5782	256
61.6044	252
61.6307	222
61.657	236
61.6832	244
61.7095	252
61.7357	233
61.762	226
61.7883	231
61.8145	230
61.8408	241
61.867	225
61.8933	220
61.9196	254
61.9458	253
61.9721	250
61.9983	250
62.0246	254
62.0509	239
62.0771	260
62.1034	234
62.1297	264
62.1559	277
62.1822	264
62.2084	257
62.2347	240
62.261	243
62.2872	258
62.3135	261
62.3397	257
62.366	271
62.3923	258
62.4185	252
62.4448	262
62.471	251
[truncated: 667 more rows]

## Sheet: CS-SiO2CaCO3
Angle	Intensity (D)
10.0024	174
10.0287	191
10.055	186
10.0812	166
10.1075	161
10.1337	185
10.16	162
10.1863	163
10.2125	181
10.2388	152
10.265	178
10.2913	164
10.3176	161
10.3438	202
10.3701	194
10.3963	175
10.4226	156
10.4489	168
10.4751	212
10.5014	158
10.5276	178
10.5539	188
10.5802	160
10.6064	147
10.6327	173
10.6589	170
10.6852	170
10.7115	186
10.7377	182
10.764	161
10.7902	190
10.8165	204
10.8428	164
10.869	187
10.8953	185
10.9216	187
10.9478	167
10.9741	174
11.0003	174
11.0266	189
11.0529	200
11.0791	193
11.1054	177
11.1316	165
11.1579	195
11.1842	164
11.2104	184
11.2367	176
11.2629	181
11.2892	155
11.3155	235
11.3417	203
11.368	208
11.3942	167
11.4205	173
11.4468	197
11.473	178
11.4993	143
11.5255	207
11.5518	188
11.5781	196
11.6043	206
11.6306	185
11.6568	165
11.6831	199
11.7094	180
11.7356	190
11.7619	159
11.7881	184
11.8144	204
11.8407	180
11.8669	169
11.8932	202
11.9195	193
11.9457	210
11.972	163
11.9982	202
12.0245	164
12.0508	197
12.077	196
12.1033	166
12.1295	184
12.1558	173
12.1821	178
12.2083	167
12.2346	200
12.2608	203
12.2871	188
12.3134	188
12.3396	171
12.3659	203
12.3921	183
12.4184	193
12.4447	182
12.4709	192
12.4972	178
12.5234	188
12.5497	189
12.576	189
12.6022	190
12.6285	183
12.6547	184
12.681	198
12.7073	183
12.7335	193
12.7598	202
12.7861	152
12.8123	211
12.8386	185
12.8648	186
12.8911	187
12.9174	179
12.9436	180
12.9699	189
12.9961	174
13.0224	189
13.0487	187
13.0749	205
13.1012	155
13.1274	173
13.1537	204
13.18	210
13.2062	152
13.2325	191
13.2587	192
13.285	180
13.3113	198
13.3375	214
13.3638	187
13.39	198
13.4163	203
13.4426	205
13.4688	185
13.4951	185
13.5213	194
13.5476	192
13.5739	195
13.6001	185
13.6264	169
13.6526	185
13.6789	186
13.7052	198
13.7314	170
13.7577	194
13.784	207
13.8102	182
13.8365	184
13.8627	204
13.889	190
13.9153	206
13.9415	223
13.9678	148
13.994	175
14.0203	192
14.0466	199
14.0728	175
14.0991	178
14.1253	177
14.1516	158
14.1779	183
14.2041	224
14.2304	200
14.2566	177
14.2829	202
14.3092	195
14.3354	198
14.3617	205
14.3879	197
14.4142	191
14.4405	203
14.4667	201
14.493	184
14.5192	194
14.5455	205
14.5718	206
14.598	205
14.6243	166
14.6506	174
14.6768	191
14.7031	197
14.7293	201
14.7556	178
14.7819	204
14.8081	216
14.8344	207
14.8606	200
14.8869	179
14.9132	192
14.9394	205
14.9657	205
14.9919	198
15.0182	212
15.0445	208
15.0707	214
15.097	198
15.1232	184
15.1495	180
15.1758	191
15.202	201
15.2283	203
15.2545	212
15.2808	195
15.3071	195
15.3333	186
15.3596	186
15.3858	211
15.4121	201
15.4384	218
15.4646	172
15.4909	211
15.5171	170
15.5434	199
15.5697	212
15.5959	208
15.6222	214
15.6485	227
15.6747	206
15.701	186
15.7272	190
15.7535	199
15.7798	197
15.806	207
15.8323	205
15.8585	206
15.8848	206
15.9111	196
15.9373	196
15.9636	192
15.9898	216
16.0161	186
16.0424	196
16.0686	211
16.0949	254
16.1211	179
16.1474	213
16.1737	175
16.1999	219
16.2262	210
16.2524	182
16.2787	212
16.305	208
16.3312	228
16.3575	186
16.3837	199
16.41	219
16.4363	211
16.4625	219
16.4888	200
16.5151	198
16.5413	192
16.5676	192
16.5938	215
16.6201	176
16.6464	187
16.6726	196
16.6989	208
16.7251	213
16.7514	182
16.7777	209
16.8039	199
16.8302	223
16.8564	227
16.8827	210
16.909	193
16.9352	199
16.9615	187
16.9877	212
17.014	215
17.0403	204
17.0665	204
17.0928	240
17.119	218
17.1453	196
17.1716	186
17.1978	188
17.2241	207
17.2503	199
17.2766	202
17.3029	196
17.3291	212
17.3554	207
17.3816	227
17.4079	228
17.4342	199
17.4604	228
17.4867	214
17.513	220
17.5392	206
17.5655	216
17.5917	213
17.618	231
17.6443	211
17.6705	206
17.6968	238
17.723	238
17.7493	231
17.7756	217
17.8018	216
17.8281	202
17.8543	200
17.8806	230
17.9069	220
17.9331	222
17.9594	227
17.9856	193
18.0119	223
18.0382	228
18.0644	231
18.0907	205
18.1169	209
18.1432	224
18.1695	199
18.1957	244
18.222	208
18.2482	199
18.2745	212
18.3008	206
18.327	240
18.3533	236
18.3796	231
18.4058	225
18.4321	229
18.4583	214
18.4846	224
18.5109	208
18.5371	202
18.5634	219
18.5896	224
18.6159	225
18.6422	214
18.6684	197
18.6947	233
18.7209	234
18.7472	218
18.7735	227
18.7997	238
18.826	216
18.8522	231
18.8785	232
18.9048	237
18.931	242
18.9573	243
18.9835	247
19.0098	217
19.0361	218
19.0623	228
19.0886	227
19.1148	210
19.1411	210
19.1674	236
19.1936	230
19.2199	225
19.2461	217
19.2724	205
19.2987	244
19.3249	221
19.3512	264
19.3775	224
19.4037	264
19.43	229
19.4562	224
19.4825	233
19.5088	217
19.535	218
19.5613	219
19.5875	233
19.6138	236
19.6401	248
19.6663	236
19.6926	220
19.7188	234
19.7451	228
19.7714	211
19.7976	235
19.8239	234
19.8501	202
19.8764	225
19.9027	234
19.9289	241
19.9552	232
19.9814	230
20.0077	207
20.034	240
20.0602	230
20.0865	234
20.1127	272
20.139	221
20.1653	242
20.1915	261
20.2178	254
20.2441	218
20.2703	275
20.2966	275
20.3228	238
20.3491	222
20.3754	237
20.4016	241
20.4279	255
20.4541	248
20.4804	218
20.5067	236
20.5329	250
20.5592	253
20.5854	239
20.6117	277
20.638	239
20.6642	230
20.6905	245
20.7167	253
20.743	247
20.7693	215
20.7955	237
20.8218	260
20.848	238
20.8743	246
20.9006	249
20.9268	273
20.9531	254
20.9793	263
21.0056	247
21.0319	237
21.0581	225
21.0844	214
21.1106	245
21.1369	247
21.1632	247
21.1894	242
21.2157	235
21.242	247
21.2682	244
21.2945	257
21.3207	246
21.347	268
21.3733	272
21.3995	242
21.4258	281
21.452	266
21.4783	207
21.5046	247
21.5308	278
21.5571	256
21.5833	225
21.6096	261
21.6359	245
21.6621	245
21.6884	282
21.7146	251
21.7409	257
21.7672	259
21.7934	227
21.8197	258
21.8459	264
21.8722	272
21.8985	268
21.9247	235
21.951	228
21.9772	258
22.0035	243
22.0298	237
22.056	274
22.0823	290
22.1086	247
22.1348	257
22.1611	255
22.1873	252
22.2136	221
22.2399	276
22.2661	242
22.2924	242
22.3186	239
22.3449	243
22.3712	250
22.3974	252
22.4237	266
22.4499	284
22.4762	279
22.5025	270
22.5287	251
22.555	248
22.5812	243
22.6075	258
22.6338	268
22.66	250
22.6863	253
22.7125	232
22.7388	222
22.7651	246
22.7913	264
22.8176	262
22.8438	263
22.8701	221
22.8964	257
22.9226	277
22.9489	273
22.9751	293
23.0014	256
23.0277	296
23.0539	305
23.0802	330
23.1065	315
23.1327	349
23.159	352
23.1852	338
23.2115	331
23.2378	299
23.264	286
23.2903	265
23.3165	247
23.3428	256
23.3691	245
23.3953	277
23.4216	265
23.4478	250
23.4741	246
23.5004	240
23.5266	247
23.5529	274
23.5791	223
23.6054	248
23.6317	248
23.6579	251
23.6842	268
23.7104	237
23.7367	232
23.763	237
23.7892	246
23.8155	229
23.8417	219
23.868	225
23.8943	249
23.9205	236
23.9468	225
23.9731	241
23.9993	256
24.0256	262
24.0518	229
24.0781	234
24.1044	243
24.1306	238
24.1569	222
24.1831	222
24.2094	234
24.2357	257
24.2619	275
24.2882	271
24.3144	257
24.3407	285
24.367	236
24.3932	255
24.4195	236
24.4457	257
24.472	246
24.4983	276
24.5245	242
24.5508	227
24.577	240
24.6033	251
24.6296	222
24.6558	229
24.6821	237
24.7083	222
24.7346	214
24.7609	228
24.7871	205
24.8134	219
24.8396	237
24.8659	223
24.8922	245
24.9184	231
24.9447	254
24.971	246
24.9972	205
25.0235	227
25.0497	210
25.076	256
25.1023	245
25.1285	186
25.1548	213
25.181	241
25.2073	212
25.2336	244
25.2598	224
25.2861	222
25.3123	237
25.3386	254
25.3649	231
25.3911	229
25.4174	212
25.4436	206
25.4699	235
25.4962	239
25.5224	237
25.5487	229
25.5749	242
25.6012	225
25.6275	201
25.6537	231
25.68	220
25.7062	208
25.7325	240
25.7588	233
25.785	232
25.8113	228
25.8376	234
25.8638	228
25.8901	234
25.9163	244
25.9426	233
25.9689	221
25.9951	208
26.0214	235
26.0476	221
26.0739	204
26.1002	212
26.1264	247
26.1527	229
26.1789	230
26.2052	213
26.2315	241
26.2577	228
26.284	210
26.3102	205
26.3365	222
26.3628	203
26.389	210
26.4153	207
26.4415	236
26.4678	225
26.4941	207
26.5203	226
26.5466	231
26.5728	254
26.5991	246
26.6254	230
26.6516	232
26.6779	252
26.7041	260
26.7304	248
26.7567	225
26.7829	250
26.8092	198
26.8355	211
26.8617	217
26.888	220
26.9142	208
26.9405	206
26.9668	195
26.993	218
27.0193	212
27.0455	216
27.0718	202
27.0981	254
27.1243	232
27.1506	218
27.1768	219
27.2031	207
27.2294	220
27.2556	221
27.2819	197
27.3081	204
27.3344	217
27.3607	187
27.3869	213
27.4132	217
27.4394	197
27.4657	210
27.492	232
27.5182	195
27.5445	206
27.5707	182
27.597	240
27.6233	208
27.6495	186
27.6758	205
27.7021	189
27.7283	198
27.7546	191
27.7808	207
27.8071	194
27.8334	214
27.8596	195
27.8859	214
27.9121	187
27.9384	194
27.9647	238
27.9909	207
28.0172	218
28.0434	185
28.0697	197
28.096	207
28.1222	195
28.1485	218
28.1747	210
28.201	196
28.2273	200
28.2535	187
28.2798	189
28.306	201
28.3323	199
28.3586	188
28.3848	185
28.4111	188
28.4373	183
28.4636	181
28.4899	216
28.5161	215
28.5424	188
28.5686	207
28.5949	231
28.6212	195
28.6474	202
28.6737	212
28.7	193
28.7262	224
28.7525	217
28.7787	229
28.805	196
28.8313	224
28.8575	196
28.8838	225
28.91	233
28.9363	201
28.9626	219
28.9888	201
29.0151	222
29.0413	204
29.0676	238
29.0939	227
29.1201	253
29.1464	247
29.1726	264
29.1989	284
29.2252	312
29.2514	357
29.2777	407
29.3039	456
29.3302	572
29.3565	808
29.3827	990
29.409	1281
29.4352	1740
29.4615	1977
29.4878	2412
29.514	2359
29.5403	1954
29.5666	1607
29.5928	1267
29.6191	874
29.6453	604
29.6716	421
29.6979	380
29.7241	313
29.7504	293
29.7766	237
29.8029	251
29.8292	233
29.8554	226
29.8817	242
29.9079	239
29.9342	203
29.9605	214
29.9867	194
30.013	191
30.0392	211
30.0655	227
30.0918	184
30.118	197
30.1443	190
30.1705	198
30.1968	203
30.2231	211
30.2493	169
30.2756	184
30.3018	190
30.3281	192
30.3544	174
30.3806	196
30.4069	187
30.4331	218
30.4594	218
30.4857	181
30.5119	205
30.5382	193
30.5645	184
30.5907	204
30.617	209
30.6432	165
30.6695	166
30.6958	182
30.722	182
30.7483	207
30.7745	180
30.8008	199
30.8271	208
30.8533	158
30.8796	182
30.9058	191
30.9321	208
30.9584	188
30.9846	174
31.0109	194
31.0371	199
31.0634	183
31.0897	191
31.1159	183
31.1422	183
31.1684	197
31.1947	193
31.221	183
31.2472	188
31.2735	180
31.2997	170
31.326	177
31.3523	187
31.3785	191
31.4048	186
31.4311	186
31.4573	215
31.4836	207
31.5098	214
31.5361	240
31.5624	227
31.5886	204
31.6149	200
31.6411	177
31.6674	191
31.6937	184
31.7199	156
31.7462	179
31.7724	185
31.7987	185
31.825	174
31.8512	171
31.8775	164
31.9037	166
31.93	167
31.9563	203
31.9825	177
32.0088	186
32.035	185
32.0613	174
32.0876	180
32.1138	164
32.1401	153
32.1663	171
32.1926	178
32.2189	201
32.2451	148
32.2714	169
32.2976	178
32.3239	163
32.3502	170
32.3764	166
32.4027	173
32.429	158
32.4552	205
32.4815	179
32.5077	194
32.534	177
32.5603	173
32.5865	173
32.6128	191
32.639	172
32.6653	166
32.6916	196
32.7178	181
32.7441	188
32.7703	146
32.7966	186
32.8229	167
32.8491	157
32.8754	195
32.9016	173
32.9279	160
32.9542	186
32.9804	150
33.0067	160
33.0329	200
33.0592	167
33.0855	204
33.1117	172
33.138	168
33.1642	170
33.1905	198
33.2168	188
33.243	159
33.2693	185
33.2956	190
33.3218	174
33.3481	162
33.3743	172
33.4006	179
33.4269	170
33.4531	202
33.4794	161
33.5056	146
33.5319	195
33.5582	168
33.5844	178
33.6107	172
33.6369	173
33.6632	156
33.6895	175
33.7157	165
33.742	180
33.7682	173
33.7945	167
33.8208	170
33.847	159
33.8733	165
33.8995	161
33.9258	172
33.9521	189
33.9783	163
34.0046	189
34.0308	159
34.0571	185
34.0834	175
34.1096	178
34.1359	176
34.1622	149
34.1884	171
34.2147	182
34.2409	167
34.2672	181
34.2935	160
34.3197	180
34.346	158
34.3722	184
34.3985	135
34.4248	167
34.451	146
34.4773	171
34.5035	170
34.5298	163
34.5561	182
34.5823	163
34.6086	161
34.6348	155
34.6611	168
34.6874	163
34.7136	164
34.7399	181
34.7661	150
34.7924	155
34.8187	155
34.8449	172
34.8712	163
34.8974	164
34.9237	165
34.95	169
34.9762	180
35.0025	176
35.0287	169
35.055	168
35.0813	170
35.1075	184
35.1338	152
35.1601	177
35.1863	152
35.2126	151
35.2388	187
35.2651	157
35.2914	178
35.3176	154
35.3439	190
35.3701	165
35.3964	149
35.4227	193
35.4489	167
35.4752	182
35.5014	155
35.5277	142
35.554	162
35.5802	165
35.6065	158
35.6327	166
35.659	163
35.6853	191
35.7115	159
35.7378	152
35.764	195
35.7903	171
35.8166	163
35.8428	211
35.8691	175
35.8953	216
35.9216	233
35.9479	249
35.9741	294
36.0004	356
36.0267	528
36.0529	538
36.0792	562
36.1054	566
36.1317	467
36.158	440
36.1842	349
36.2105	322
36.2367	250
36.263	217
36.2893	177
36.3155	208
36.3418	158
36.368	188
36.3943	184
36.4206	170
36.4468	167
36.4731	175
36.4993	140
36.5256	181
36.5519	142
36.5781	142
36.6044	149
36.6306	177
36.6569	168
36.6832	165
36.7094	167
36.7357	168
36.7619	156
36.7882	176
36.8145	185
36.8407	157
36.867	147
36.8932	153
36.9195	167
36.9458	154
36.972	155
36.9983	152
37.0246	154
37.0508	191
37.0771	170
37.1033	146
37.1296	165
37.1559	173
37.1821	170
37.2084	158
37.2346	143
37.2609	164
37.2872	171
37.3134	152
37.3397	161
37.3659	161
37.3922	174
37.4185	134
37.4447	140
37.471	167
37.4972	173
37.5235	130
37.5498	163
37.576	158
37.6023	143
37.6285	172
37.6548	145
37.6811	181
37.7073	161
37.7336	151
37.7598	158
37.7861	143
37.8124	146
37.8386	158
37.8649	185
37.8912	161
37.9174	145
37.9437	158
37.9699	150
37.9962	145
38.0225	156
38.0487	150
38.075	150
38.1012	167
38.1275	185
38.1538	156
38.18	189
38.2063	169
38.2325	183
38.2588	153
38.2851	154
38.3113	168
38.3376	138
38.3638	185
38.3901	133
38.4164	151
38.4426	137
38.4689	137
38.4951	146
38.5214	146
38.5477	178
38.5739	151
38.6002	146
38.6264	142
38.6527	161
38.679	125
38.7052	158
38.7315	147
38.7577	180
38.784	163
38.8103	164
38.8365	144
38.8628	146
38.8891	137
38.9153	172
38.9416	159
38.9678	143
38.9941	160
39.0204	164
39.0466	155
39.0729	157
39.0991	175
39.1254	156
39.1517	175
39.1779	201
39.2042	163
39.2304	179
39.2567	176
39.283	178
39.3092	192
39.3355	230
39.3617	218
39.388	297
39.4143	362
39.4405	526
39.4668	574
39.493	599
39.5193	731
39.5456	741
39.5718	617
39.5981	564
39.6243	467
39.6506	415
39.6769	336
39.7031	240
39.7294	275
39.7557	235
39.7819	198
39.8082	185
39.8344	185
39.8607	155
39.887	169
39.9132	138
39.9395	150
39.9657	135
39.992	152
40.0183	146
40.0445	139
40.0708	161
40.097	135
40.1233	168
40.1496	166
40.1758	165
40.2021	139
40.2283	151
40.2546	138
40.2809	136
40.3071	147
40.3334	163
40.3596	137
40.3859	155
40.4122	137
40.4384	143
40.4647	162
40.4909	155
40.5172	143
40.5435	160
40.5697	143
40.596	143
40.6222	142
40.6485	132
40.6748	143
40.701	152
40.7273	164
40.7536	153
40.7798	127
40.8061	113
40.8323	124
40.8586	157
40.8849	134
40.9111	150
40.9374	158
40.9636	152
40.9899	159
41.0162	134
41.0424	137
41.0687	146
41.0949	129
41.1212	149
41.1475	159
41.1737	148
41.2	155
41.2262	159
41.2525	136
41.2788	137
41.305	167
41.3313	154
41.3575	166
41.3838	149
41.4101	143
41.4363	137
41.4626	175
41.4888	163
41.5151	164
41.5414	157
41.5676	164
41.5939	146
41.6202	152
41.6464	174
41.6727	147
41.6989	137
41.7252	154
41.7515	140
41.7777	155
41.804	128
41.8302	162
41.8565	173
41.8828	151
41.909	140
41.9353	144
41.9615	154
41.9878	151
42.0141	151
42.0403	157
42.0666	178
42.0928	167
42.1191	155
42.1454	132
42.1716	172
42.1979	127
42.2241	149
42.2504	158
42.2767	151
42.3029	151
42.3292	144
42.3554	156
42.3817	151
42.408	161
42.4342	129
42.4605	157
42.4867	133
42.513	156
42.5393	145
42.5655	136
42.5918	167
42.6181	165
42.6443	151
42.6706	152
42.6968	176
42.7231	139
42.7494	163
42.7756	151
42.8019	145
42.8281	168
42.8544	179
42.8807	149
42.9069	163
42.9332	157
42.9594	169
42.9857	175
43.012	166
43.0382	183
43.0645	197
43.0907	221
43.117	232
43.1433	274
43.1695	375
43.1958	529
43.222	646
43.2483	697
43.2746	675
43.3008	697
43.3271	602
43.3533	570
43.3796	486
43.4059	386
43.4321	365
43.4584	258
43.4847	204
43.5109	199
43.5372	196
43.5634	195
43.5897	194
43.616	177
43.6422	163
43.6685	162
43.6947	175
43.721	167
43.7473	160
43.7735	164
43.7998	153
43.826	168
43.8523	148
43.8786	151
43.9048	178
43.9311	163
43.9573	173
43.9836	161
44.0099	176
44.0361	130
44.0624	142
44.0886	188
44.1149	154
44.1412	165
44.1674	160
44.1937	155
44.2199	155
44.2462	164
44.2725	144
44.2987	169
44.325	154
44.3512	152
44.3775	154
44.4038	151
44.43	132
44.4563	150
44.4826	156
44.5088	151
44.5351	155
44.5613	161
44.5876	132
44.6139	161
44.6401	151
44.6664	158
44.6926	145
44.7189	166
44.7452	136
44.7714	126
44.7977	156
44.8239	136
44.8502	163
44.8765	163
44.9027	140
44.929	158
44.9552	153
44.9815	133
45.0078	146
45.034	137
45.0603	162
45.0865	149
45.1128	169
45.1391	155
45.1653	152
45.1916	159
45.2178	179
45.2441	151
45.2704	160
45.2966	165
45.3229	143
45.3492	172
45.3754	144
45.4017	162
45.4279	149
45.4542	166
45.4805	163
45.5067	163
45.533	155
45.5592	172
45.5855	128
45.6118	139
45.638	135
45.6643	158
45.6905	149
45.7168	141
45.7431	140
45.7693	151
45.7956	150
45.8218	151
45.8481	137
45.8744	152
45.9006	169
45.9269	143
45.9531	182
45.9794	163
46.0057	174
46.0319	170
46.0582	153
46.0844	164
46.1107	169
46.137	141
46.1632	150
46.1895	136
46.2157	171
46.242	139
46.2683	177
46.2945	135
46.3208	132
46.3471	178
46.3733	175
46.3996	140
46.4258	163
46.4521	146
46.4784	159
46.5046	153
46.5309	138
46.5571	165
46.5834	148
46.6097	188
46.6359	143
46.6622	141
46.6884	168
46.7147	148
46.741	163
46.7672	188
46.7935	160
46.8197	164
46.846	175
46.8723	168
46.8985	182
46.9248	154
46.951	176
46.9773	196
47.0036	184
47.0298	199
47.0561	180
47.0823	241
47.1086	209
47.1349	255
47.1611	296
47.1874	344
47.2137	332
47.2399	309
47.2662	333
47.2924	289
47.3187	309
47.345	265
47.3712	240
47.3975	288
47.4237	326
47.45	336
47.4763	325
47.5025	396
47.5288	497
47.555	555
47.5813	690
47.6076	788
47.6338	782
47.6601	697
47.6863	626
47.7126	567
47.7389	586
47.7651	502
47.7914	410
47.8176	347
47.8439	298
47.8702	221
47.8964	232
47.9227	224
47.9489	197
47.9752	206
48.0015	187
48.0277	185
48.054	175
48.0802	173
48.1065	182
48.1328	173
48.159	200
48.1853	170
48.2116	169
48.2378	183
48.2641	196
48.2903	200
48.3166	205
48.3429	211
48.3691	232
48.3954	221
48.4216	231
48.4479	312
48.4742	346
48.5004	447
48.5267	556
48.5529	720
48.5792	829
48.6055	896
48.6317	869
48.658	830
48.6842	707
48.7105	696
48.7368	584
48.763	550
48.7893	419
48.8155	382
48.8418	295
48.8681	257
48.8943	229
48.9206	205
48.9468	183
48.9731	177
48.9994	169
49.0256	175
49.0519	165
49.0782	170
49.1044	204
49.1307	144
49.1569	184
49.1832	164
49.2095	162
49.2357	196
49.262	151
49.2882	189
49.3145	169
49.3408	177
49.367	159
49.3933	153
49.4195	148
49.4458	150
49.4721	142
49.4983	163
49.5246	176
49.5508	143
49.5771	159
49.6034	168
49.6296	139
49.6559	131
49.6821	144
49.7084	167
49.7347	149
49.7609	172
49.7872	156
49.8134	154
49.8397	136
49.866	159
49.8922	141
49.9185	150
49.9447	120
49.971	130
49.9973	156
50.0235	161
50.0498	181
50.0761	138
50.1023	164
50.1286	125
50.1548	167
50.1811	145
50.2074	145
50.2336	179
50.2599	139
50.2861	162
50.3124	163
50.3387	164
50.3649	168
50.3912	149
50.4174	140
50.4437	151
50.47	142
50.4962	154
50.5225	170
50.5487	162
50.575	143
50.6013	157
50.6275	148
50.6538	152
50.68	149
50.7063	149
50.7326	164
50.7588	145
50.7851	121
50.8113	136
50.8376	152
50.8639	127
50.8901	145
50.9164	153
50.9427	154
50.9689	138
50.9952	154
51.0214	154
51.0477	142
51.074	186
51.1002	148
51.1265	132
51.1527	146
51.179	155
51.2053	130
51.2315	147
51.2578	164
51.284	188
51.3103	135
51.3366	133
51.3628	150
51.3891	163
51.4153	134
51.4416	135
51.4679	154
51.4941	140
51.5204	146
51.5466	162
51.5729	139
51.5992	142
51.6254	160
51.6517	136
51.6779	141
51.7042	117
51.7305	154
51.7567	131
51.783	115
51.8092	149
51.8355	131
51.8618	167
51.888	146
51.9143	151
51.9406	121
51.9668	126
51.9931	146
52.0193	164
52.0456	149
52.0719	123
52.0981	132
52.1244	176
52.1506	157
52.1769	127
52.2032	128
52.2294	159
52.2557	158
52.2819	151
52.3082	146
52.3345	122
52.3607	132
52.387	144
52.4132	151
52.4395	167
52.4658	159
52.492	131
52.5183	160
52.5445	166
52.5708	144
52.5971	148
52.6233	135
52.6496	149
52.6758	120
52.7021	143
52.7284	159
52.7546	140
52.7809	151
52.8072	145
52.8334	144
52.8597	137
52.8859	124
52.9122	138
52.9385	154
52.9647	145
52.991	148
53.0172	159
53.0435	140
53.0698	145
53.096	157
53.1223	146
53.1485	128
53.1748	127
53.2011	148
53.2273	156
53.2536	128
53.2798	122
53.3061	154
53.3324	128
53.3586	137
53.3849	141
53.4111	147
53.4374	139
53.4637	149
53.4899	153
53.5162	139
53.5424	160
53.5687	136
53.595	143
53.6212	151
53.6475	137
53.6737	137
53.7	127
53.7263	133
53.7525	157
53.7788	142
53.8051	130
53.8313	143
53.8576	139
53.8838	151
53.9101	161
53.9364	142
53.9626	136
53.9889	128
54.0151	154
54.0414	152
54.0677	138
54.0939	129
54.1202	160
54.1464	127
54.1727	145
54.199	139
54.2252	130
54.2515	154
54.2777	158
54.304	158
54.3303	155
54.3565	135
54.3828	144
54.409	127
54.4353	124
54.4616	127
54.4878	142
54.5141	148
54.5403	151
54.5666	141
54.5929	151
54.6191	128
54.6454	138
54.6717	126
54.6979	145
54.7242	155
54.7504	144
54.7767	158
54.803	148
54.8292	163
54.8555	158
54.8817	176
54.908	121
54.9343	125
54.9605	138
54.9868	137
55.013	162
55.0393	148
55.0656	133
55.0918	132
55.1181	137
55.1443	144
55.1706	127
55.1969	143
55.2231	125
55.2494	146
55.2756	132
55.3019	143
55.3282	143
55.3544	145
55.3807	144
55.4069	164
55.4332	157
55.4595	133
55.4857	143
55.512	136
55.5383	122
55.5645	162
55.5908	145
55.617	142
55.6433	143
55.6696	195
55.6958	132
55.7221	150
55.7483	133
55.7746	131
55.8009	123
55.8271	141
55.8534	139
55.8796	145
55.9059	139
55.9322	143
55.9584	137
55.9847	149
56.0109	134
56.0372	147
56.0635	136
56.0897	133
56.116	147
56.1422	149
56.1685	148
56.1948	148
56.221	138
56.2473	163
56.2735	144
56.2998	169
56.3261	169
56.3523	162
56.3786	146
56.4048	156
56.4311	175
56.4574	160
56.4836	152
56.5099	161
56.5362	152
56.5624	171
56.5887	222
56.6149	260
56.6412	266
56.6675	279
56.6937	291
56.72	259
56.7462	230
56.7725	258
56.7988	262
56.825	230
56.8513	220
56.8775	229
56.9038	184
56.9301	203
56.9563	191
56.9826	159
57.0088	152
57.0351	183
57.0614	158
57.0876	132
57.1139	163
57.1401	171
57.1664	158
57.1927	186
57.2189	166
57.2452	185
57.2714	180
57.2977	177
57.324	198
57.3502	225
57.3765	240
57.4028	300
57.429	382
57.4553	463
57.4815	565
57.5078	569
57.5341	513
57.5603	466
57.5866	439
57.6128	417
57.6391	424
57.6654	390
57.6916	355
57.7179	294
57.7441	236
57.7704	235
57.7967	194
57.8229	212
57.8492	195
57.8754	155
57.9017	180
57.928	145
57.9542	155
57.9805	169
58.0067	162
58.033	180
58.0593	151
58.0855	168
58.1118	168
58.138	183
58.1643	180
58.1906	189
58.2168	180
58.2431	154
58.2693	175
58.2956	168
58.3219	167
58.3481	173
58.3744	167
58.4007	121
58.4269	130
58.4532	136
58.4794	155
58.5057	177
58.532	158
58.5582	169
58.5845	149
58.6107	144
58.637	139
58.6633	145
58.6895	164
58.7158	123
58.742	119
58.7683	143
58.7946	139
58.8208	149
58.8471	128
58.8733	146
58.8996	153
58.9259	157
58.9521	133
58.9784	137
59.0046	142
59.0309	144
59.0572	154
59.0834	146
59.1097	157
59.1359	135
59.1622	150
59.1885	139
59.2147	131
59.241	150
59.2673	143
59.2935	125
59.3198	131
59.346	115
59.3723	145
59.3986	160
59.4248	126
59.4511	146
59.4773	134
59.5036	146
59.5299	147
59.5561	145
59.5824	133
59.6086	159
59.6349	141
59.6612	127
59.6874	137
59.7137	148
59.7399	145
59.7662	147
59.7925	163
59.8187	136
59.845	161
59.8712	147
59.8975	135
59.9238	176
59.95	151
59.9763	147
60.0025	154
60.0288	156
60.0551	149
60.0813	126
60.1076	145
60.1338	143
60.1601	160
60.1864	144
60.2126	157
60.2389	142
60.2652	152
60.2914	155
60.3177	147
60.3439	141
60.3702	142
60.3965	158
60.4227	147
60.449	124
60.4752	171
60.5015	183
60.5278	146
60.554	159
60.5803	183
60.6065	170
60.6328	176
60.6591	199
60.6853	220
60.7116	245
60.7378	290
60.7641	292
60.7904	293
60.8166	295
60.8429	304
60.8691	265
60.8954	286
60.9217	287
60.9479	275
60.9742	266
61.0004	242
61.0267	249
61.053	266
61.0792	225
61.1055	236
61.1318	222
61.158	232
61.1843	260
61.2105	212
61.2368	214
61.2631	192
61.2893	174
61.3156	198
61.3418	192
61.3681	185
61.3944	202
61.4206	252
61.4469	227
61.4731	277
61.4994	259
61.5257	257
61.5519	225
61.5782	237
61.6044	227
61.6307	222
61.657	216
61.6832	186
61.7095	203
61.7357	166
61.762	179
61.7883	168
61.8145	157
61.8408	168
61.867	141
61.8933	142
61.9196	142
61.9458	140
61.9721	134
61.9983	156
62.0246	175
62.0509	147
62.0771	154
62.1034	148
62.1297	150
62.1559	141
62.1822	142
62.2084	143
62.2347	154
62.261	124
62.2872	133
62.3135	127
62.3397	129
62.366	153
62.3923	129
62.4185	158
62.4448	160
62.471	125
[truncated: 667 more rows]

## Sheet: XRD CHiotsan
Angle	Intensity
10.0024	622
10.0287	606
10.055	692
10.0812	676
10.1075	593
10.1337	606
10.16	689
10.1863	657
10.2125	645
10.2388	603
10.265	676
10.2913	604
10.3176	615
10.3438	633
10.3701	686
10.3963	592
10.4226	602
10.4489	669
10.4751	651
10.5014	681
10.5276	641
10.5539	594
10.5802	634
10.6064	655
10.6327	672
10.6589	645
10.6852	587
10.7115	648
10.7377	610
10.764	612
10.7902	632
10.8165	620
10.8428	632
10.869	625
10.8953	586
10.9216	609
10.9478	614
10.9741	610
11.0003	603
11.0266	601
11.0529	570
11.0791	550
11.1054	579
11.1316	552
11.1579	612
11.1842	564
11.2104	583
11.2367	590
11.2629	611
11.2892	592
11.3155	568
11.3417	547
11.368	566
11.3942	555
11.4205	551
11.4468	564
11.473	605
11.4993	573
11.5255	586
11.5518	523
11.5781	588
11.6043	567
11.6306	564
11.6568	570
11.6831	590
11.7094	580
11.7356	569
11.7619	568
11.7881	516
11.8144	519
11.8407	583
11.8669	567
11.8932	596
11.9195	540
11.9457	548
11.972	532
11.9982	557
12.0245	565
12.0508	571
12.077	564
12.1033	555
12.1295	553
12.1558	531
12.1821	579
12.2083	544
12.2346	588
12.2608	535
12.2871	536
12.3134	556
12.3396	561
12.3659	537
12.3921	573
12.4184	558
12.4447	574
12.4709	525
12.4972	556
12.5234	512
12.5497	546
12.576	529
12.6022	568
12.6285	597
12.6547	586
12.681	557
12.7073	519
12.7335	562
12.7598	582
12.7861	562
12.8123	568
12.8386	488
12.8648	522
12.8911	511
12.9174	591
12.9436	560
12.9699	555
12.9961	535
13.0224	582
13.0487	542
13.0749	563
13.1012	522
13.1274	573
13.1537	559
13.18	592
13.2062	587
13.2325	551
13.2587	578
13.285	534
13.3113	536
13.3375	561
13.3638	601
13.39	523
13.4163	560
13.4426	601
13.4688	551
13.4951	565
13.5213	570
13.5476	553
13.5739	583
13.6001	584
13.6264	614
13.6526	606
13.6789	564
13.7052	581
13.7314	575
13.7577	585
13.784	597
13.8102	558
13.8365	557
13.8627	582
13.889	559
13.9153	569
13.9415	558
13.9678	587
13.994	598
14.0203	597
14.0466	583
14.0728	543
14.0991	606
14.1253	580
14.1516	558
14.1779	611
14.2041	589
14.2304	572
14.2566	622
14.2829	591
14.3092	578
14.3354	636
14.3617	609
14.3879	605
14.4142	591
14.4405	572
14.4667	563
14.493	591
14.5192	549
14.5455	603
14.5718	584
14.598	577
14.6243	564
14.6506	609
14.6768	616
14.7031	652
14.7293	593
14.7556	599
14.7819	654
14.8081	582
14.8344	609
14.8606	602
14.8869	597
14.9132	624
14.9394	607
14.9657	597
14.9919	654
15.0182	614
15.0445	589
15.0707	566
15.097	576
15.1232	614
15.1495	580
15.1758	632
15.202	627
15.2283	660
15.2545	616
15.2808	616
15.3071	576
15.3333	621
15.3596	623
15.3858	613
15.4121	605
15.4384	623
15.4646	611
15.4909	649
15.5171	654
15.5434	633
15.5697	608
15.5959	616
15.6222	669
15.6485	633
15.6747	661
15.701	649
15.7272	630
15.7535	637
15.7798	621
15.806	627
15.8323	662
15.8585	618
15.8848	625
15.9111	634
15.9373	600
15.9636	639
15.9898	633
16.0161	641
16.0424	651
16.0686	690
16.0949	642
16.1211	663
16.1474	649
16.1737	702
16.1999	672
16.2262	664
16.2524	631
16.2787	693
16.305	659
16.3312	662
16.3575	665
16.3837	665
16.41	636
16.4363	643
16.4625	631
16.4888	663
16.5151	668
16.5413	700
16.5676	692
16.5938	719
16.6201	720
16.6464	659
16.6726	702
16.6989	709
16.7251	715
16.7514	656
16.7777	658
16.8039	666
16.8302	657
16.8564	724
16.8827	691
16.909	725
16.9352	665
16.9615	704
16.9877	721
17.014	723
17.0403	733
17.0665	740
17.0928	725
17.119	712
17.1453	739
17.1716	740
17.1978	723
17.2241	704
17.2503	768
17.2766	760
17.3029	800
17.3291	754
17.3554	734
17.3816	783
17.4079	773
17.4342	747
17.4604	729
17.4867	765
17.513	778
17.5392	791
17.5655	780
17.5917	786
17.618	774
17.6443	796
17.6705	777
17.6968	795
17.723	860
17.7493	843
17.7756	842
17.8018	782
17.8281	882
17.8543	800
17.8806	806
17.9069	800
17.9331	908
17.9594	864
17.9856	837
18.0119	824
18.0382	827
18.0644	817
18.0907	797
18.1169	892
18.1432	905
18.1695	838
18.1957	869
18.222	843
18.2482	866
18.2745	908
18.3008	887
18.327	864
18.3533	940
18.3796	939
18.4058	944
18.4321	977
18.4583	982
18.4846	971
18.5109	939
18.5371	984
18.5634	939
18.5896	1028
18.6159	1046
18.6422	1091
18.6684	1052
18.6947	1085
18.7209	1073
18.7472	1129
18.7735	1123
18.7997	1089
18.826	1085
18.8522	1105
18.8785	1134
18.9048	1253
18.931	1205
18.9573	1267
18.9835	1233
19.0098	1284
19.0361	1331
19.0623	1378
19.0886	1354
19.1148	1271
19.1411	1408
19.1674	1474
19.1936	1434
19.2199	1586
19.2461	1528
19.2724	1517
19.2987	1518
19.3249	1549
19.3512	1593
19.3775	1678
19.4037	1599
19.43	1709
19.4562	1689
19.4825	1683
19.5088	1797
19.535	1771
19.5613	1708
19.5875	1829
19.6138	1671
19.6401	1855
19.6663	1819
19.6926	1720
19.7188	1750
19.7451	1840
19.7714	1773
19.7976	1800
19.8239	1773
19.8501	1738
19.8764	1715
19.9027	1677
19.9289	1666
19.9552	1655
19.9814	1680
20.0077	1568
20.034	1630
20.0602	1546
20.0865	1582
20.1127	1603
20.139	1590
20.1653	1634
20.1915	1451
20.2178	1568
20.2441	1470
20.2703	1459
20.2966	1507
20.3228	1477
20.3491	1518
20.3754	1464
20.4016	1402
20.4279	1384
20.4541	1366
20.4804	1359
20.5067	1346
20.5329	1317
20.5592	1303
20.5854	1398
20.6117	1377
20.638	1321
20.6642	1364
20.6905	1338
20.7167	1263
20.743	1312
20.7693	1306
20.7955	1287
20.8218	1364
20.848	1248
20.8743	1242
20.9006	1307
20.9268	1259
20.9531	1272
20.9793	1223
21.0056	1254
21.0319	1269
21.0581	1251
21.0844	1204
21.1106	1313
21.1369	1272
21.1632	1258
21.1894	1259
21.2157	1330
21.242	1197
21.2682	1255
21.2945	1324
21.3207	1263
21.347	1180
21.3733	1273
21.3995	1256
21.4258	1246
21.452	1265
21.4783	1247
21.5046	1309
21.5308	1252
21.5571	1257
21.5833	1240
21.6096	1287
21.6359	1254
21.6621	1242
21.6884	1256
21.7146	1272
21.7409	1259
21.7672	1177
21.7934	1236
21.8197	1289
21.8459	1291
21.8722	1273
21.8985	1284
21.9247	1201
21.951	1278
21.9772	1294
22.0035	1231
22.0298	1320
22.056	1173
22.0823	1199
22.1086	1271
22.1348	1200
22.1611	1227
22.1873	1256
22.2136	1253
22.2399	1226
22.2661	1238
22.2924	1201
22.3186	1232
22.3449	1202
22.3712	1120
22.3974	1153
22.4237	1162
22.4499	1152
22.4762	1159
22.5025	1138
22.5287	1154
22.555	1128
22.5812	1150
22.6075	1077
22.6338	1092
22.66	1091
22.6863	1084
22.7125	1048
22.7388	1125
22.7651	1015
22.7913	1131
22.8176	1025
22.8438	1046
22.8701	986
22.8964	1021
22.9226	990
22.9489	940
22.9751	1052
23.0014	1042
23.0277	1004
23.0539	992
23.0802	978
23.1065	974
23.1327	937
23.159	967
23.1852	959
23.2115	967
23.2378	962
23.264	980
23.2903	1000
23.3165	926
23.3428	897
23.3691	956
23.3953	947
23.4216	948
23.4478	875
23.4741	867
23.5004	945
23.5266	919
23.5529	949
23.5791	963
23.6054	923
23.6317	929
23.6579	961
23.6842	925
23.7104	903
23.7367	925
23.763	938
23.7892	902
23.8155	866
23.8417	913
23.868	873
23.8943	922
23.9205	958
23.9468	956
23.9731	875
23.9993	870
24.0256	910
24.0518	813
24.0781	902
24.1044	885
24.1306	923
24.1569	881
24.1831	845
24.2094	890
24.2357	908
24.2619	911
24.2882	903
24.3144	835
24.3407	918
24.367	878
24.3932	839
24.4195	923
24.4457	863
24.472	876
24.4983	808
24.5245	933
24.5508	830
24.577	865
24.6033	878
24.6296	902
24.6558	862
24.6821	866
24.7083	860
24.7346	844
24.7609	848
24.7871	866
24.8134	908
24.8396	861
24.8659	833
24.8922	872
24.9184	872
24.9447	874
24.971	837
24.9972	830
25.0235	860
25.0497	875
25.076	891
25.1023	831
25.1285	823
25.1548	838
25.181	855
25.2073	863
25.2336	859
25.2598	829
25.2861	835
25.3123	843
25.3386	888
25.3649	835
25.3911	816
25.4174	853
25.4436	859
25.4699	838
25.4962	866
25.5224	881
25.5487	807
25.5749	831
25.6012	856
25.6275	827
25.6537	843
25.68	835
25.7062	847
25.7325	851
25.7588	852
25.785	849
25.8113	864
25.8376	867
25.8638	876
25.8901	832
25.9163	828
25.9426	817
25.9689	812
25.9951	860
26.0214	830
26.0476	819
26.0739	798
26.1002	818
26.1264	786
26.1527	878
26.1789	819
26.2052	804
26.2315	871
26.2577	804
26.284	820
26.3102	838
26.3365	853
26.3628	860
26.389	829
26.4153	873
26.4415	881
26.4678	826
26.4941	861
26.5203	853
26.5466	793
26.5728	845
26.5991	870
26.6254	830
26.6516	856
26.6779	737
26.7041	855
26.7304	737
26.7567	777
26.7829	792
26.8092	811
26.8355	808
26.8617	818
26.888	800
26.9142	881
26.9405	801
26.9668	846
26.993	823
27.0193	782
27.0455	853
27.0718	853
27.0981	852
27.1243	831
27.1506	885
27.1768	822
27.2031	799
27.2294	761
27.2556	869
27.2819	808
27.3081	849
27.3344	825
27.3607	799
27.3869	820
27.4132	842
27.4394	805
27.4657	828
27.492	895
27.5182	763
27.5445	819
27.5707	792
27.597	842
27.6233	797
27.6495	788
27.6758	787
27.7021	800
27.7283	798
27.7546	796
27.7808	822
27.8071	766
27.8334	788
27.8596	806
27.8859	805
27.9121	822
27.9384	817
27.9647	805
27.9909	763
28.0172	798
28.0434	805
28.0697	804
28.096	820
28.1222	791
28.1485	809
28.1747	758
28.201	843
28.2273	821
28.2535	828
28.2798	846
28.306	756
28.3323	828
28.3586	797
28.3848	840
28.4111	811
28.4373	826
28.4636	752
28.4899	803
28.5161	814
28.5424	786
28.5686	835
28.5949	757
28.6212	776
28.6474	778
28.6737	823
28.7	774
28.7262	838
28.7525	817
28.7787	835
28.805	811
28.8313	760
28.8575	804
28.8838	833
28.91	802
28.9363	759
28.9626	784
28.9888	792
29.0151	791
29.0413	835
29.0676	828
29.0939	828
29.1201	870
29.1464	843
29.1726	791
29.1989	820
29.2252	789
29.2514	815
29.2777	783
29.3039	767
29.3302	808
29.3565	774
29.3827	724
29.409	812
29.4352	746
29.4615	759
29.4878	734
29.514	755
29.5403	792
29.5666	781
29.5928	773
29.6191	751
29.6453	806
29.6716	774
29.6979	755
29.7241	788
29.7504	794
29.7766	715
29.8029	797
29.8292	770
29.8554	727
29.8817	683
29.9079	775
29.9342	750
29.9605	772
29.9867	753
30.013	783
30.0392	754
30.0655	727
30.0918	744
30.118	753
30.1443	722
30.1705	737
30.1968	734
30.2231	720
30.2493	735
30.2756	765
30.3018	739
30.3281	759
30.3544	738
30.3806	763
30.4069	705
30.4331	747
30.4594	791
30.4857	763
30.5119	781
30.5382	721
30.5645	729
30.5907	724
30.617	745
30.6432	721
30.6695	740
30.6958	727
30.722	754
30.7483	737
30.7745	795
30.8008	789
30.8271	730
30.8533	781
30.8796	770
30.9058	750
30.9321	727
30.9584	724
30.9846	748
31.0109	810
31.0371	724
31.0634	748
31.0897	723
31.1159	763
31.1422	748
31.1684	758
31.1947	721
31.221	731
31.2472	716
31.2735	728
31.2997	747
31.326	708
31.3523	710
31.3785	746
31.4048	737
31.4311	738
31.4573	776
31.4836	689
31.5098	774
31.5361	765
31.5624	739
31.5886	757
31.6149	699
31.6411	755
31.6674	747
31.6937	709
31.7199	752
31.7462	717
31.7724	777
31.7987	726
31.825	760
31.8512	773
31.8775	694
31.9037	725
31.93	755
31.9563	745
31.9825	771
32.0088	806
32.035	715
32.0613	709
32.0876	718
32.1138	745
32.1401	732
32.1663	726
32.1926	721
32.2189	740
32.2451	709
32.2714	769
32.2976	727
32.3239	749
32.3502	748
32.3764	702
32.4027	773
32.429	727
32.4552	712
32.4815	739
32.5077	726
32.534	715
32.5603	706
32.5865	742
32.6128	723
32.639	732
32.6653	717
32.6916	774
32.7178	737
32.7441	755
32.7703	787
32.7966	790
32.8229	704
32.8491	778
32.8754	760
32.9016	720
32.9279	683
32.9542	733
32.9804	756
33.0067	701
33.0329	752
33.0592	751
33.0855	747
33.1117	754
33.138	728
33.1642	740
33.1905	760
33.2168	696
33.243	723
33.2693	726
33.2956	727
33.3218	766
33.3481	728
33.3743	743
33.4006	758
33.4269	722
33.4531	797
33.4794	729
33.5056	761
33.5319	728
33.5582	718
33.5844	747
33.6107	733
33.6369	754
33.6632	749
33.6895	760
33.7157	769
33.742	731
33.7682	790
33.7945	821
33.8208	772
33.847	779
33.8733	778
33.8995	740
33.9258	784
33.9521	771
33.9783	760
34.0046	785
34.0308	776
34.0571	751
34.0834	766
34.1096	757
34.1359	811
34.1622	786
34.1884	757
34.2147	766
34.2409	779
34.2672	793
34.2935	819
34.3197	732
34.346	799
34.3722	788
34.3985	839
34.4248	795
34.451	865
34.4773	822
34.5035	774
34.5298	777
34.5561	770
34.5823	789
34.6086	770
34.6348	795
34.6611	803
34.6874	866
34.7136	857
34.7399	810
34.7661	765
34.7924	838
34.8187	842
34.8449	825
34.8712	829
34.8974	830
34.9237	805
34.95	811
34.9762	849
35.0025	832
35.0287	843
35.055	783
35.0813	810
35.1075	821
35.1338	769
35.1601	834
35.1863	861
35.2126	846
35.2388	806
35.2651	904
35.2914	832
35.3176	879
35.3439	829
35.3701	815
35.3964	793
35.4227	864
35.4489	778
35.4752	839
35.5014	851
35.5277	783
35.554	834
35.5802	859
35.6065	858
35.6327	852
35.659	859
35.6853	845
35.7115	873
35.7378	819
35.764	847
35.7903	840
35.8166	866
35.8428	825
35.8691	820
35.8953	840
35.9216	843
35.9479	842
35.9741	754
36.0004	848
36.0267	871
36.0529	841
36.0792	857
36.1054	817
36.1317	816
36.158	743
36.1842	879
36.2105	819
36.2367	835
36.263	846
36.2893	810
36.3155	850
36.3418	737
36.368	847
36.3943	838
36.4206	821
36.4468	863
36.4731	787
36.4993	826
36.5256	782
36.5519	798
36.5781	805
36.6044	804
36.6306	821
36.6569	731
36.6832	774
36.7094	855
36.7357	793
36.7619	826
36.7882	805
36.8145	877
36.8407	798
36.867	737
36.8932	799
36.9195	803
36.9458	848
36.972	819
36.9983	803
37.0246	876
37.0508	849
37.0771	826
37.1033	795
37.1296	784
37.1559	854
37.1821	810
37.2084	785
37.2346	789
37.2609	785
37.2872	779
37.3134	802
37.3397	761
37.3659	771
37.3922	852
37.4185	793
37.4447	832
37.471	780
37.4972	749
37.5235	824
37.5498	772
37.576	812
37.6023	754
37.6285	820
37.6548	810
37.6811	807
37.7073	823
37.7336	788
37.7598	828
37.7861	778
37.8124	806
37.8386	783
37.8649	861
37.8912	828
37.9174	759
37.9437	802
37.9699	800
37.9962	782
38.0225	826
38.0487	864
38.075	807
38.1012	794
38.1275	875
38.1538	841
38.18	783
38.2063	811
38.2325	821
38.2588	853
38.2851	863
38.3113	860
38.3376	826
38.3638	822
38.3901	846
38.4164	822
38.4426	773
38.4689	858
38.4951	826
38.5214	853
38.5477	818
38.5739	893
38.6002	763
38.6264	777
38.6527	810
38.679	794
38.7052	902
38.7315	836
38.7577	845
38.784	845
38.8103	841
38.8365	845
38.8628	813
38.8891	789
38.9153	756
38.9416	861
38.9678	861
38.9941	832
39.0204	800
39.0466	827
39.0729	902
39.0991	812
39.1254	837
39.1517	835
39.1779	866
39.2042	839
39.2304	899
39.2567	807
39.283	851
39.3092	849
39.3355	842
39.3617	840
39.388	822
39.4143	838
39.4405	844
39.4668	861
39.493	882
39.5193	890
39.5456	846
39.5718	881
39.5981	917
39.6243	804
39.6506	839
39.6769	861
39.7031	847
39.7294	911
39.7557	829
39.7819	871
39.8082	864
39.8344	847
39.8607	852
39.887	878
39.9132	848
39.9395	857
39.9657	831
39.992	918
40.0183	878
40.0445	870
40.0708	863
40.097	859
40.1233	901
40.1496	889
40.1758	867
40.2021	888
40.2283	875
40.2546	875
40.2809	808
40.3071	888
40.3334	890
40.3596	933
40.3859	853
40.4122	849
40.4384	909
40.4647	920
40.4909	868
40.5172	861
40.5435	865
40.5697	870
40.596	863
40.6222	904
40.6485	851
40.6748	894
40.701	898
40.7273	879
40.7536	924
40.7798	867
40.8061	880
40.8323	832
40.8586	819
40.8849	906
40.9111	857
40.9374	850
40.9636	870
40.9899	858
41.0162	822
41.0424	901
41.0687	895
41.0949	892
41.1212	873
41.1475	795
41.1737	899
41.2	815
41.2262	872
41.2525	823
41.2788	895
41.305	903
41.3313	851
41.3575	819
41.3838	871
41.4101	895
41.4363	808
41.4626	895
41.4888	845
41.5151	829
41.5414	866
41.5676	790
41.5939	870
41.6202	840
41.6464	815
41.6727	846
41.6989	864
41.7252	850
41.7515	841
41.7777	859
41.804	812
41.8302	859
41.8565	779
41.8828	870
41.909	833
41.9353	828
41.9615	852
41.9878	784
42.0141	848
42.0403	813
42.0666	781
42.0928	848
42.1191	828
42.1454	822
42.1716	876
42.1979	804
42.2241	871
42.2504	877
42.2767	859
42.3029	852
42.3292	828
42.3554	847
42.3817	831
42.408	865
42.4342	819
42.4605	813
42.4867	824
42.513	878
42.5393	880
42.5655	798
42.5918	811
42.6181	865
42.6443	810
42.6706	802
42.6968	809
42.7231	803
42.7494	809
42.7756	821
42.8019	875
42.8281	799
42.8544	817
42.8807	797
42.9069	811
42.9332	799
42.9594	817
42.9857	813
43.012	786
43.0382	775
43.0645	812
43.0907	809
43.117	786
43.1433	762
43.1695	867
43.1958	807
43.222	841
43.2483	807
43.2746	768
43.3008	810
43.3271	803
43.3533	784
43.3796	798
43.4059	787
43.4321	780
43.4584	801
43.4847	828
43.5109	835
43.5372	803
43.5634	832
43.5897	816
43.616	827
43.6422	783
43.6685	822
43.6947	802
43.721	786
43.7473	805
43.7735	738
43.7998	799
43.826	796
43.8523	802
43.8786	827
43.9048	741
43.9311	846
43.9573	769
43.9836	751
44.0099	756
44.0361	797
44.0624	744
44.0886	748
44.1149	853
44.1412	786
44.1674	726
44.1937	803
44.2199	800
44.2462	824
44.2725	802
44.2987	768
44.325	787
44.3512	782
44.3775	752
44.4038	804
44.43	816
44.4563	814
44.4826	721
44.5088	732
44.5351	728
44.5613	818
44.5876	751
44.6139	828
44.6401	812
44.6664	743
44.6926	801
44.7189	796
44.7452	768
44.7714	850
44.7977	797
44.8239	733
44.8502	757
44.8765	783
44.9027	860
44.929	810
44.9552	742
44.9815	770
45.0078	810
45.034	809
45.0603	784
45.0865	784
45.1128	823
45.1391	795
45.1653	804
45.1916	797
45.2178	810
45.2441	768
45.2704	779
45.2966	814
45.3229	785
45.3492	808
45.3754	758
45.4017	775
45.4279	794
45.4542	800
45.4805	787
45.5067	744
45.533	799
45.5592	759
45.5855	794
45.6118	775
45.638	745
45.6643	764
45.6905	770
45.7168	793
45.7431	761
45.7693	729
45.7956	752
45.8218	826
45.8481	761
45.8744	776
45.9006	794
45.9269	797
45.9531	754
45.9794	757
46.0057	726
46.0319	768
46.0582	743
46.0844	714
46.1107	755
46.137	768
46.1632	792
46.1895	742
46.2157	775
46.242	755
46.2683	822
46.2945	762
46.3208	796
46.3471	778
46.3733	704
46.3996	715
46.4258	740
46.4521	733
46.4784	752
46.5046	780
46.5309	785
46.5571	746
46.5834	780
46.6097	742
46.6359	739
46.6622	764
46.6884	747
46.7147	746
46.741	697
46.7672	753
46.7935	713
46.8197	766
46.846	777
46.8723	779
46.8985	773
46.9248	739
46.951	743
46.9773	720
47.0036	728
47.0298	792
47.0561	751
47.0823	768
47.1086	760
47.1349	727
47.1611	733
47.1874	752
47.2137	713
47.2399	743
47.2662	721
47.2924	719
47.3187	705
47.345	739
47.3712	745
47.3975	699
47.4237	744
47.45	721
47.4763	793
47.5025	745
47.5288	734
47.555	726
47.5813	738
47.6076	721
47.6338	757
47.6601	729
47.6863	726
47.7126	733
47.7389	708
47.7651	707
47.7914	692
47.8176	729
47.8439	739
47.8702	706
47.8964	769
47.9227	688
47.9489	768
47.9752	715
48.0015	735
48.0277	698
48.054	789
48.0802	709
48.1065	699
48.1328	710
48.159	776
48.1853	688
48.2116	721
48.2378	709
48.2641	657
48.2903	682
48.3166	709
48.3429	680
48.3691	732
48.3954	705
48.4216	708
48.4479	723
48.4742	702
48.5004	692
48.5267	719
48.5529	697
48.5792	684
48.6055	704
48.6317	743
48.658	709
48.6842	738
48.7105	677
48.7368	721
48.763	686
48.7893	682
48.8155	712
48.8418	706
48.8681	641
48.8943	702
48.9206	701
48.9468	667
48.9731	734
48.9994	703
49.0256	637
49.0519	716
49.0782	693
49.1044	687
49.1307	669
49.1569	729
49.1832	712
49.2095	702
49.2357	694
49.262	655
49.2882	679
49.3145	653
49.3408	703
49.367	704
49.3933	700
49.4195	720
49.4458	669
49.4721	621
49.4983	723
49.5246	634
49.5508	629
49.5771	668
49.6034	665
49.6296	657
49.6559	666
49.6821	693
49.7084	677
49.7347	639
49.7609	704
49.7872	635
49.8134	683
49.8397	698
49.866	676
49.8922	684
49.9185	673
49.9447	704
49.971	674
49.9973	683
50.0235	666
50.0498	707
50.0761	672
50.1023	658
50.1286	718
50.1548	672
50.1811	694
50.2074	670
50.2336	713
50.2599	660
50.2861	678
50.3124	620
50.3387	618
50.3649	605
50.3912	677
50.4174	681
50.4437	730
50.47	686
50.4962	710
50.5225	645
50.5487	712
50.575	700
50.6013	729
50.6275	678
50.6538	681
50.68	691
50.7063	651
50.7326	671
50.7588	707
50.7851	676
50.8113	676
50.8376	676
50.8639	676
50.8901	639
50.9164	694
50.9427	686
50.9689	688
50.9952	724
51.0214	662
51.0477	610
51.074	685
51.1002	691
51.1265	676
51.1527	647
51.179	657
51.2053	669
51.2315	717
51.2578	709
51.284	655
51.3103	677
51.3366	685
51.3628	686
51.3891	650
51.4153	639
51.4416	679
51.4679	688
51.4941	668
51.5204	694
51.5466	681
51.5729	689
51.5992	687
51.6254	701
51.6517	662
51.6779	612
51.7042	664
51.7305	634
51.7567	662
51.783	624
51.8092	687
51.8355	660
51.8618	647
51.888	604
51.9143	605
51.9406	630
51.9668	634
51.9931	654
52.0193	641
52.0456	647
52.0719	688
52.0981	670
52.1244	670
52.1506	685
52.1769	636
52.2032	707
52.2294	624
52.2557	613
52.2819	669
52.3082	572
52.3345	733
52.3607	671
52.387	661
52.4132	654
52.4395	635
52.4658	673
52.492	615
52.5183	668
52.5445	679
52.5708	651
52.5971	607
52.6233	689
52.6496	674
52.6758	605
52.7021	676
52.7284	652
52.7546	631
52.7809	674
52.8072	670
52.8334	616
52.8597	663
52.8859	667
52.9122	643
52.9385	635
52.9647	675
52.991	693
53.0172	687
53.0435	611
53.0698	641
53.096	674
53.1223	671
53.1485	653
53.1748	674
53.2011	701
53.2273	708
53.2536	664
53.2798	698
53.3061	701
53.3324	615
53.3586	669
53.3849	643
53.4111	641
53.4374	677
53.4637	638
53.4899	663
53.5162	674
53.5424	651
53.5687	655
53.595	644
53.6212	641
53.6475	642
53.6737	684
53.7	656
53.7263	649
53.7525	693
53.7788	682
53.8051	665
53.8313	646
53.8576	677
53.8838	638
53.9101	624
53.9364	637
53.9626	649
53.9889	627
54.0151	634
54.0414	635
54.0677	678
54.0939	634
54.1202	618
54.1464	663
54.1727	640
54.199	652
54.2252	585
54.2515	692
54.2777	630
54.304	687
54.3303	633
54.3565	635
54.3828	635
54.409	616
54.4353	652
54.4616	641
54.4878	617
54.5141	564
54.5403	614
54.5666	634
54.5929	614
54.6191	666
54.6454	580
54.6717	607
54.6979	613
54.7242	639
54.7504	641
54.7767	608
54.803	588
54.8292	633
54.8555	596
54.8817	649
54.908	621
54.9343	597
54.9605	606
54.9868	625
55.013	626
55.0393	605
55.0656	644
55.0918	613
55.1181	623
55.1443	648
55.1706	638
55.1969	629
55.2231	627
55.2494	642
55.2756	558
55.3019	626
55.3282	592
55.3544	631
55.3807	608
55.4069	659
55.4332	644
55.4595	624
55.4857	632
55.512	608
55.5383	622
55.5645	620
55.5908	623
55.617	635
55.6433	582
55.6696	608
55.6958	585
55.7221	624
55.7483	609
55.7746	613
55.8009	586
55.8271	632
55.8534	639
55.8796	634
55.9059	605
55.9322	597
55.9584	625
55.9847	619
56.0109	563
56.0372	576
56.0635	622
56.0897	610
56.116	579
56.1422	557
56.1685	593
56.1948	607
56.221	565
56.2473	585
56.2735	575
56.2998	605
56.3261	587
56.3523	622
56.3786	585
56.4048	592
56.4311	608
56.4574	579
56.4836	609
56.5099	581
56.5362	622
56.5624	607
56.5887	601
56.6149	639
56.6412	615
56.6675	573
56.6937	628
56.72	553
56.7462	594
56.7725	599
56.7988	579
56.825	567
56.8513	619
56.8775	600
56.9038	574
56.9301	584
56.9563	578
56.9826	595
57.0088	580
57.0351	593
57.0614	589
57.0876	603
57.1139	583
57.1401	616
57.1664	548
57.1927	584
57.2189	572
57.2452	601
57.2714	623
57.2977	575
57.324	581
57.3502	623
57.3765	575
57.4028	589
57.429	638
57.4553	585
57.4815	569
57.5078	559
57.5341	596
57.5603	610
57.5866	565
57.6128	545
57.6391	612
57.6654	601
57.6916	588
57.7179	579
57.7441	577
57.7704	596
57.7967	610
57.8229	560
57.8492	577
57.8754	571
57.9017	594
57.928	589
57.9542	553
57.9805	556
58.0067	538
58.033	584
58.0593	582
58.0855	629
58.1118	573
58.138	576
58.1643	586
58.1906	566
58.2168	598
58.2431	545
58.2693	598
58.2956	551
58.3219	629
58.3481	600
58.3744	598
58.4007	575
58.4269	566
58.4532	575
58.4794	589
58.5057	605
58.532	581
58.5582	557
58.5845	572
58.6107	582
58.637	578
58.6633	570
58.6895	565
58.7158	533
58.742	583
58.7683	596
58.7946	579
58.8208	605
58.8471	589
58.8733	508
58.8996	630
58.9259	543
58.9521	562
58.9784	582
59.0046	542
59.0309	600
59.0572	543
59.0834	574
59.1097	602
59.1359	564
59.1622	584
59.1885	571
59.2147	591
59.241	623
59.2673	602
59.2935	519
59.3198	544
59.346	519
59.3723	617
59.3986	530
59.4248	535
59.4511	572
59.4773	565
59.5036	607
59.5299	595
59.5561	588
59.5824	567
59.6086	626
59.6349	560
59.6612	578
59.6874	577
59.7137	581
59.7399	527
59.7662	551
59.7925	575
59.8187	601
59.845	561
59.8712	567
59.8975	567
59.9238	541
59.95	544
59.9763	543
60.0025	597
60.0288	537
60.0551	599
60.0813	579
60.1076	574
60.1338	550
60.1601	577
60.1864	588
60.2126	582
60.2389	533
60.2652	549
60.2914	616
60.3177	558
60.3439	584
60.3702	532
60.3965	568
60.4227	555
60.449	612
60.4752	587
60.5015	525
60.5278	534
60.554	581
60.5803	552
60.6065	544
60.6328	559
60.6591	534
60.6853	580
60.7116	567
60.7378	564
60.7641	577
60.7904	603
60.8166	581
60.8429	515
60.8691	612
60.8954	503
60.9217	572
60.9479	569
60.9742	554
61.0004	578
61.0267	555
61.053	589
61.0792	547
61.1055	595
61.1318	577
61.158	582
61.1843	588
61.2105	576
61.2368	554
61.2631	578
61.2893	567
61.3156	576
61.3418	530
61.3681	584
61.3944	538
61.4206	589
61.4469	572
61.4731	586
61.4994	557
61.5257	535
61.5519	575
61.5782	598
61.6044	559
61.6307	533
61.657	598
61.6832	542
61.7095	558
61.7357	553
61.762	542
61.7883	534
61.8145	549
61.8408	606
61.867	619
61.8933	585
61.9196	580
61.9458	566
61.9721	600
61.9983	578
62.0246	575
62.0509	501
62.0771	543
62.1034	590
62.1297	507
62.1559	549
62.1822	580
62.2084	563
62.2347	595
62.261	562
62.2872	567
62.3135	504
62.3397	531
62.366	576
62.3923	587
62.4185	598
62.4448	588
62.471	543
[truncated: 667 more rows]
